# Supplementary material
Source: HighWire-hosted journal article supplement (https://www.cmaj.ca/highwire/filestream/57762/field_highwire_adjunct_files/2/acupunct-lee-appendix_3.pdf)
Supplement: acupunct-lee-appendix_3.pdf [file acupunct-lee-appendix_3.pdf]

**Appendix 3 (as supplied by the authors):** Searched results of databases and their reason for exclusion

**Acupuncture for Functional Recovery after Stroke:  
A Systematic Review of Sham-Controlled Randomized Clinical Trials**

| No. | Search Result                                                                                                                                                                                                                                                             | Reason for exclusion                      |
|-----|---------------------------------------------------------------------------------------------------------------------------------------------------------------------------------------------------------------------------------------------------------------------------|-------------------------------------------|
| 1   | Dong Jun li, Xi Gang ming, Zhou Shao hua, et al. 32 patients of pseudobulbar palsy after stroke treating with acupuncture Lianquan point combined with Fengchi point. Chinese Journal of Practical Nervous Diseases. 2008;11(1):38-39.                                    | Not compared with sham or placebo control |
| 2   | Na GH, Lee DH, Jeong YH, Kim HH, Ryu CR, Cho MR, Chae US. A case of a patient with cerebral infarction treated by Sa-Am's Ohaeng-acupuncture and Liuqi-acupuncture. The Korean Journal of Meridian and Acupoint. 2006;23(1): 137-145.                                     | Case report                               |
| 3   | Hsing LC, Yeo JJ, Yu G, Seo ES, Jang IS. A case of subcortical aphasic stroke treated with speech-language therapy and Korean medical therapy. Korean Journal of Oriental Internal Medicine. 2005;26(3):733-740.                                                          | Not related to efficacy of acupuncture    |
| 4   | Kim DM, Kim HK, Ha SY, Nam SS, Kim YS. A case report of communication disorder associated with post-stroke. Journal of Meridian and Acupoint. 2007;24(3):47-54.                                                                                                           | Not related to efficacy of acupuncture    |
| 5   | Kim HJ, Kim YK, Kim WS, Kang SY, Sim KJ, Yoon JW, Baek DG, Lee JD, Won JH, Lee SK. A case Report of One Patient with paralytic Strabismus Resulting from Pontine Hematoma During Puerperium. Korean Journal of Oriental Internal Medicine. 2004;25(3):640-647.            | Not related to efficacy of acupuncture    |
| 6   | Yi, JH. A case report of the poststroke seizure. The Journal of Korea CHUNA Manual Medicine for Spine and Nerves. 2006;1(1):27-33.                                                                                                                                        | Not related to efficacy of acupuncture    |
| 7   | Lim HS, Kim JB. A case report on the CVA patient with the sense disorder of equilibrium. Korean Journal of Oriental Physiology and pathology. 2003;17(5):1339-1342.                                                                                                       | Not focus on functional recovery          |
| 8   | Lee HE, Ahn TW. A case study on patient with diplopia caused by stroke. The Journal Thesis of Institute of Korean medicine in Daejeon University. 2007;16(1):199-206.                                                                                                     | Not related to efficacy of acupuncture    |
| 9   | Kim SJ, Jeong JA, Jeong SM, Roh YM, Jeon HR, Ann JJ, Jeon SY, Kim HC, Hong S. A Clinical Case Report of Gaze Palsy due to Thalamic Infarction. Korean Journal of Oriental Internal Medicine. 2006;27(2):533-537.                                                          | Not related to efficacy of acupuncture    |
| 10  | Shin Ji, Kim MR, Seo UK, Jeong JC. A clinical report about the effect of Fumigating therapy on a acute stroke patient. Journal of Korean Oriental Medicine. 2001;22(4):158-163.                                                                                           | Not related to efficacy of acupuncture    |
| 11  | Baek KM, Kim MJ, Lee HU, Lim SM, An JJ, Yoo HR, Jo HK, Kim YS, Seol IC. A clinical study of 3 cases of stroke patients with dysphagia treated by simultaneous scalp acupuncture and electroacupuncture. Korean Journal of Oriental Internal Medicine. 2007;28(3):632-644. | Not focus on functional recovery          |
| 12  | WANG Min, LIU Ya-jing. A Clinical Study of 80 Patients on "Regulating Du And Ren Channel" Acupuncture Therapy of Urinary Incontinence After Apoplexy. Liaoning Journal of Traditional Chinese Medicine. 2009;36(2):273-274.                                               | Compared two types of acupuncture         |
| 13  | Park SJ, Lee JA, Lee SM, An HJ, Park SD. A clinical study of acupuncture and auricular acupuncture effect on insomnia. Journal of Oriental Neurology. 2001;12(2):135-146.                                                                                                 | Compared two types of acupuncture         |
| 14  | Sun JJ, Chung SY, Hwang JW, Kim SM, Jung JH, Choi CM, Jung WS, Moon SK, Cho KH, Kim YS. A clinical study of acupuncture with aromatherapy on poststroke depression patients. Korean Journal of Oriental Medicine. 2006;27(2):480-487.                                     | Not related to efficacy of acupuncture    |
| 15  | Jang KJ. A clinical study of admission type in CVA. The Journal of Korean Acupuncture and Moxibustion Society. 1999;16(4):137-147.                                                                                                                                        | Not related to efficacy of acupuncture    |
| 16  | Lee DY, Lee GM, Yeom SC, Kim DH, Kim DJ. A clinical study of bee venom acupuncture therapy on shoulder pain patients in stroke sequelae. The Journal of Korean Acupuncture and Moxibustion Society. 2006;23(4):69-80.                                                     | Pharmacopuncture                          |
| 17  | Kim JD, Kwon JN, Kim YG, Lee SH, Kim SH, Son YH, Kim JK. A Clinical Study of Korean Medical Treatment and Korean and Western Medical Treatment on Acute Ischemic Stroke Patients. Korean Journal of Oriental Medicine. 2007;28(4):168-175.                                | Not randomized controlled trial           |
| 18  | Ha CH, Han SG, Cho MR, Ryu CR, Lee BR. A clinical study on 29 cases with Stroke treated by momom acupuncture therapy and scalp acupuncture. The Journal of Korean Acupuncture and Moxibustion Society. 2001;18(4):82-90.                                                  | Not randomized controlled trial           |
| 19  | Sheng W, Kong M, Zhang R. A Clinical Study on Effect of Acupuncture and Drugs on SOD Activity/MDA Content in Patients of Ischemic Stroke. Journal of Henan University of Chinese Medicine. 2005;20(121):36-37.                                                            | Not compared with sham control            |
| 20  | Son JH, Lee SH, Jung HC, Han SH, Nam Y. A clinical study on the improved dysphagia associated with ischemic stroke using acupuncture therapy(Yomchon CV23). The Journal of Clinical Thesis Korean Acupuncture and Moxibustion Society. 2003;71-77.                        | Not focus on functional recovery          |
| 21  | Kim YS, Hong JW, Jung WS, Na BJ, Park SU, Moon SK, Park JM, Ko CN, Cho KH, Bae HS. A Comparative Study of Motor Recovery from Stroke between High and Low Frequency Electrical Acupoint Stimulation. Journal of Korean Oriental Medicine. 2007;28(3):289-298.             | Compared two types of acupuncture         |

|    |                                                                                                                                                                                                                                                                                                            |                                        |
|----|------------------------------------------------------------------------------------------------------------------------------------------------------------------------------------------------------------------------------------------------------------------------------------------------------------|----------------------------------------|
| 22 | Ye TS, Zhu BL, Han Z, Guo XR, Xie WX, Chen Y, Dong HX, Zheng RX. A control study of magnetic resonance diffusion weighted imaging of patients with acute cerebral infarction and early intervention with resuscitating and scalp acupuncture therapies. <i>Chin J TCM WM Crit Care</i> . 2008;15(2):95-97. | Complex therapy                        |
| 23 | Li G, Jack CR Jr, Yang ES. A fMRI study of somatosensory-implicated acupuncture points in stable somatosensory stroke patients. <i>J Magn Reson Imaging</i> . 2006;24(5):1018-1024.                                                                                                                        | Not randomized controlled trial        |
| 24 | Bae EJ, Hong KE, Lee H, Lee BR, Yim YK, Kim YJ. fMRI study on the cerebral activity induced by electro-acupuncture on Fenglong(ST40). <i>The Journal of Korean Acupuncture and Moxibustion Society</i> . 2003;20(5):208-226.                                                                               | Uncontrolled trial                     |
| 25 | Kang JH, Lee H, Lee BR, Hong KE, Yim YK, Kim YJ. A fMRI study on the cerebral activity induced by electro-acupuncture on K7(Fuliu). <i>The Journal of Korean Acupuncture and Moxibustion Society</i> . 2003;20(4):66-84.                                                                                   | Uncontrolled trial                     |
| 26 | Hong KE, Lee BR, Lee H, Yim YK, Kim YJ. fMRI study on the cerebral activity induced by electro-acupuncture on Sanyinjiao(SP6). <i>The Journal of Korean Acupuncture and Moxibustion Society</i> . 2003;20(3):86-103.                                                                                       | Uncontrolled trial                     |
| 27 | Kim JH, Lee H, Lim YK, Hong KE, Lee BR, Kim YJ. A fMRI study on the cerebral activity induced by electro-acupuncture on SP9(Yinlingquan). <i>The Journal of Korean Acupuncture and Moxibustion Society</i> . 2003;20(4):114-133.                                                                           | Uncontrolled trial                     |
| 28 | Ha CH, Lee H, Lim YK, Hong KE, Lee BR, Kim YJ. A fMRI study on the cerebral activity induced by electro-acupuncture on Taichong(Liv3). <i>The Journal of Korean Acupuncture and Moxibustion Society</i> . 2003;20(5):187-207.                                                                              | Uncontrolled trial                     |
| 29 | Park KY, Lee BR, Lee H, Yim YK, Hong KE, Kim YJ. fMRI study on the cerebral activity induced by electro-acupuncture on Taixi(K3). <i>The Journal of Korean Acupuncture and Moxibustion Society</i> . 2003;20(3):194-208.                                                                                   | Uncontrolled trial                     |
| 30 | Kim YI, Kim YH, Lim YK, Lee H, Lee BR, Kim YJ. A fMRI study on the cerebral activity induced by electro-acupuncture on Zusanli(ST36). <i>The Journal of Korean Acupuncture and Moxibustion Society</i> . 2003;20(5):133-150.                                                                               | Uncontrolled trial                     |
| 31 | Lee JT, Yim YK. A Literature Study on the Application of Sa-am Acupuncture for the Treatment of Stroke. <i>The Journal of Korean Acupuncture and Moxibustion Society</i> . 2006;23(5):115-125.                                                                                                             | Not clinical trial                     |
| 32 | Yang ZX, Bian JL, Xu JF, Shen PFi, Xiong J, Guo JK, Zhang ZL, Li J, Shi XM. A Multi-center Randomized Controlled Trial on Acupuncture for Patients with Convalescent Cerebral Infarction. <i>Shanghai Journal of Traditional Chinese Medicine</i> . 2008;42(11):33-36.                                     | Compared two types of acupuncture      |
| 33 | Yu YT, Yang YH. A New Facilitation Technique; Electric Nerve Trunk Stimulation for Treating Hemiplegic Acroparalysis. <i>Chin J Rehabilitation</i> . 1994;9(3):119-121.                                                                                                                                    | Compared two types of acupuncture      |
| 34 | Kjendahl A, Sällström S, Osten PE, Stanghelle JK, Borchgrevink CF. Acupuncture in the treatment of stroke patients in the subacute stage; A randomized, controlled study- <i>Clin Rehabil</i> . 1997;11(3):192-200.                                                                                        | Not compared with sham control         |
| 35 | Xie R, Wang D, Wang X. A prospective clinical case-controlled study of electro-acupuncture treatment in patients with acute stroke. <i>Chin J Geriatric Care</i> . 2004;2(1):7-11.                                                                                                                         | Included                               |
| 36 | Jin SH, Lim S, Park HJ, Lee SK. A Qualitative Meta-analysis on Oriental Medicine Clinical Research for Stroke. <i>Journal of Korean Oriental Medicine</i> . 2003;24(2):47-58.                                                                                                                              | Not clinical trial                     |
| 37 | Zeng X, Liu M, Wu B, Zhang S, Rao P, Wu J, Wen T, Li L, Liu J, Liu F, Wu X, Yang Y. A randomized controlled trial of acupuncture for acute ischemic stroke; a pilot study. <i>Chin J Neurol</i> . 2003;36(4):247-251.                                                                                      | Not compared with sham control         |
| 38 | Rao P, Zhou L, Mao M, Bai Y, Wen T, Tang Y, Guo W. A randomized controlled trial of acupuncture treatment of acute ischemic stroke. <i>Chinese Acupuncture and Moxibustion</i> . 2006;26(10):694-696.                                                                                                      | Not compared with sham control         |
| 39 | Hu H, Chung C, Liu T, Chen R, Chen C, Chou P, Huang W, Lin J, Tsuei J. A randomized controlled trial on the treatment for acute partial ischemic stroke with acupuncture. <i>Neuroepidemiology</i> . 1993;12:106-113.                                                                                      | Not compared with sham control         |
| 40 | Choe YT, Kang SK. A Study of Effective Acupuncture points on the Cerebrovascular Accident. <i>Hwangje Medical Journal</i> . 1978;3(4):1-15.                                                                                                                                                                | Not clinical trial                     |
| 41 | Kim DH, Kim CH. A study on cooperative treatment with both the western and oriental medical department in CVA patients. <i>The Journal of Korean Society of Physical Therapy</i> . 2004;16(3):467-482.                                                                                                     | Not related to efficacy of acupuncture |
| 42 | Jung TY, Choi SH, Kim KW, Lee YK, Lim SC, Lee KM, Seo JC. A Study on SNP of IL10 in Cerebral Infarction Patients. <i>The Journal of Korean Acupuncture and Moxibustion Society</i> . 2006;23(2):173-179.                                                                                                   | Not randomized controlled trial        |
| 43 | Yoon BH, Kim KS. A study on the moxibustion applied clinically to hemiplegia on stroke. <i>The Journal of Korean Acupuncture and Moxibustion Society</i> . 1997;14(1):165-178.                                                                                                                             | Not related to efficacy of acupuncture |
| 44 | Yang CY, Shin YI, Joo MC, Kil EY. A Survey on the Use of Oriental Medicine and Complementary & Alternative Medicine in the Stroke Patients of Korea. <i>The Journal of Wonkwang Medical Science</i> . 2004;19(2):311-322.                                                                                  | Not clinical trial                     |
| 45 | Prady SL, Richmond SJ, Morton VM, Macpherson H. A systematic evaluation of the impact of STRICTA and CONSORT recommendations on quality of reporting for acupuncture trials. <i>PLoS One</i> . 2008;3(2):e1577.                                                                                            | Not related to stroke                  |
| 46 | Ernst E, Lee MS. A trial design that generates only "positive" results. <i>J Postgrad Med</i> . 2008;54(3):214-216.                                                                                                                                                                                        | Not related to stroke                  |
| 47 | Cheng Y, Tang QS. Abdominal acupuncture in treating liver-qi stagnation and spleen deficiency in the elderly with post-stroke depression; A randomized and controlled observation. <i>Journal of Clinical Rehabilitative Tissue Engineering Research</i> . 2007;11(39):7791-7794.                          | Not compared with sham control         |

|    |                                                                                                                                                                                                                                                                                                       |                                   |
|----|-------------------------------------------------------------------------------------------------------------------------------------------------------------------------------------------------------------------------------------------------------------------------------------------------------|-----------------------------------|
| 48 | Yang HY, Liu TY, Wang YH, Ying SG, Zheng CY, Kuai L, Gao M. Acupoint electrogymnastics therapy for treatment of apoplectic hemiplegia; a multicenter randomized control study. <i>Chinese Acupuncture and Moxibustion</i> . 2008;28(9):635-638.                                                       | Compared two types of acupuncture |
| 49 | Yang H, Liu T, Kuai L, et al. Acupoint electrogymnastics therapy in stroke hemiplegia. <i>Neural Regeneration Research</i> . 2008;3(10):1145-1151.                                                                                                                                                    | Compared two types of acupuncture |
| 50 | Abildgaard U. Acupuncture against stroke?. <i>Tidsskr Nor Laegeforen</i> . 1995;115(23):2877.                                                                                                                                                                                                         | Not clinical trial                |
| 51 | Xie HL, Cao XM, Huang SH, Liao CF. Acupuncture and Cupping for Treatment of Hiccup in Cases of Cerebrovascular Accident. <i>Journal of Traditional Chinese Medicine</i> . 2006;26(3):175-176.                                                                                                         | Complex therapy                   |
| 52 | Liu KJ, Li JY, Cao SP. Acupuncture and Rehabilitation Manipulation in Treating 43 Patients with Semiluxation of Shoulder after Stroke. <i>Chinese Journal of Integrated Traditional and Western Medicine</i> . 2003;23(2):137-138.                                                                    | Not randomized controlled trial   |
| 53 | Shifflett SC. Acupuncture and stroke rehabilitation. <i>Stroke</i> . 2001;32(8):1934-1936.                                                                                                                                                                                                            | Not clinical trial                |
| 54 | Johansson B, Hajer E, Arbin M, Britton M, Langstrom G, Terent A, Ursing D, Asplund K. Acupuncture and Transcutaneous Nerve Stimulation in Stroke Rehabilitation; a randomized, controlled trial. <i>Stroke</i> . 2001;32:707-713.                                                                     | Not compared with sham control    |
| 55 | Lee HS, Park HJ, Park JB, Kim MJ, Hong MS, Yang JS, Choi SM, Lee HJ. Acupuncture application for neurological disorders. <i>Neurological research</i> . 2007;29(Suppl 1):S49-54.                                                                                                                      | Not clinical trial                |
| 56 | Fan L, Zhu XP, Meng CR, Wen X. Acupuncture applied on the deltoid muscle and musculus triceps brachii for upper limb muscle spasm in patients with cerebral infarction: Comparison with the acupunctre at yang channel point. <i>Chinese Journal of Clinical Rehabilitation</i> . 2005;9(25):129-131. | Compared two types of acupuncture |
| 57 | Ernst E, White AR. Acupuncture as an adjuvant therapy in stroke rehabilitation?. <i>Wien Med Wochenschr</i> . 1996;146(21-22):556-558.                                                                                                                                                                | Not clinical trial                |
| 58 | Luo WP, Huang HY, Zhu JY. Acupuncture Combined with Language Training for Treatment of Motor Aphasia Caused by Ischemic Apoplexy. <i>World journal of acupuncture-moxibustion</i> . 2008;18(4):9-16.                                                                                                  | Complex therapy                   |
| 59 | Fink M, Rollnik JD, Bijak M, Borstadt C, Dauper J, Guerguelcheva V et al. Acupuncture does not help spasticity following stroke. <i>Acupuncture in Medicine</i> . 2004;22(4):224.                                                                                                                     | Not clinical trial                |
| 60 | Zhang SH, Liu M, Asplund K, Li L. Acupuncture for acute stroke. <i>Cochrane Database Syst Rev</i> . 2005;(2):CD003317.                                                                                                                                                                                | Not clinical trial                |
| 61 | Xie Y, Wang L, He J, Wu T. Acupuncture for dysphagia in acute stroke. <i>Cochrane Database Syst Rev</i> . 2008;(3):CD006076.                                                                                                                                                                          | Not clinical trial                |
| 62 | Seki T, Iwasaki K, Arai H. Acupuncture for dysphagia in poststroke patients; a videofluoroscopic study. <i>J Am Geriatr Soc</i> . 2005;53(6):1083-4.                                                                                                                                                  | Not compared with sham control    |
| 63 | Ma Q, Zhao J, Zheng W, Tain G, Wei G. Acupuncture for restoring consciousness and inducing resuscitation in treating disturbance of consciousness due to acute stroke. <i>Chinese Journal of Clinical Rehabilitation</i> . 2006;10(11):142-143.                                                       | Not compared with sham control    |
| 64 | Wu HM, Tang JL, Lin XP, Lau J, Leung PC, Woo J, Li YP. Acupuncture for stroke rehabilitation. <i>Cochrane Database Syst Rev</i> . 2006;3:CD004131.                                                                                                                                                    | Not clinical trial                |
| 65 | Park J, White AR, James MA, et al. Acupuncture for subacute stroke rehabilitation: a Sham-controlled, subject- and assessor-blind, randomized trial. <i>Arch Intern Med</i> . 26 2005;165(17):2026-2031.                                                                                              | Included                          |
| 66 | Wayne PM, Krebs DE, Macklin EA, et al. Acupuncture for upper-extremity rehabilitation in chronic stroke: a randomized sham-controlled study. <i>Arch Phys Med Rehabil</i> . 2005;86(12):2248-2255.                                                                                                    | Included                          |
| 67 | Rabinstein AA, Shulman LM. Acupuncture in clinical neurology. <i>Neurologist</i> . 2003;9(3):137-48.                                                                                                                                                                                                  | Not clinical trial                |
| 68 | Hopwood V. Acupuncture in stroke recovery: a literature review. <i>Complementary Therapies in Medicine</i> . 1996;4(4):258-263.                                                                                                                                                                       | Not clinical trial                |
| 69 | Johansson BB. Acupuncture in stroke rehabilitation. <i>Acupuncture in Medicine</i> . 1995;13(2):81-84.                                                                                                                                                                                                | Not compared with sham control    |
| 70 | Naeser MA, Alexander MP, Stiassny-Eder D, Lannin LN, Bachman D. Acupuncture in the treatment of hand paresis in chronic and acute stroke patients; improvement observed in all cases. <i>Clinical Rehabilitation</i> . 1994;8(2):127-141.                                                             | Not compared with sham control    |
| 71 | Sällström S, Kjendahl A, Osten PE, Stanghelle JK, Borchgrevink CF. Acupuncture in the treatment of stroke patients in the subacute stage; a randomized, controlled study. <i>Complementary Therapies in Medicine</i> . 1996;4:193-197.                                                                | Not compared with sham control    |
| 72 | Liang FR, Tang Y. Acupuncture in treatment of cerebrosis: advances in clinical research over 20 years. <i>Journal of Chinese Intergrative Medicine</i> . 2008;6(6):561-564.                                                                                                                           | Not clinical trial                |
| 73 | Moffet HH. Acupuncture may be ineffective for stroke. <i>Arch Intern Med</i> . 2006;166(8):930.                                                                                                                                                                                                       | Not clinical trial                |
| 74 | Li WJ, wang YH. Acupuncture plus exercise in the treatment of sequelae of cerebral vascular accidents. <i>International Journal of Clinical Acupuncture</i> . 1997;8(3):291-292.                                                                                                                      | Uncontrolled trial                |
| 75 | Wang T, Liu CZ, Yu JC, Han JX, Jiang W. Acupuncture protected cerebral multi-infarction rats from memory impairment by regulating the expression of apoptosis related genes Bcl-2 and Bax in hippocampus. <i>Physiology and Behavior</i> . 2009;96(1):155-161.                                        | Animal study                      |
| 76 | Hong MS. Acupuncture Shows No Benefit Over Sham Treatment for Stroke Rehabilitation. <i>Journal of Clinical Outcomes Management</i> . 2005;12(1):607-608.                                                                                                                                             | Not clinical trial                |
| 77 | Jeun SS, Kim JS, Kim BS, Park SD. Acupuncture Stimulation for Motor Cortex Activities: A 3T fMRI Study. <i>The American Journal of Chinese Medicine</i> . 2005;33(4):573-578.                                                                                                                         | Not related to stroke             |
| 78 | Liu SY, Wei TS, Liu PT, Chang YJ, Hsieh CL, Li TC. Acupuncture stimulation improves balance function in stroke patients: A single-blinded cotrolled, randomized study. <i>American Journal of Chinese Medicine</i> . 2009;37(3):483-494.                                                              | Not compared with sham control    |

|     |                                                                                                                                                                                                                                                                                                   |                                        |
|-----|---------------------------------------------------------------------------------------------------------------------------------------------------------------------------------------------------------------------------------------------------------------------------------------------------|----------------------------------------|
| 79  | Xie QF, Wang JH, Zou YH, Wang XZ. Acupuncture therapy at three different time for motor function and activity of daily life in patients with acute cerebral infarction. <i>Chinese Journal of Clinical Rehabilitation</i> . 2005;9(17):128-129.                                                   | Compared two types of acupuncture      |
| 80  | XU Hong, SUN Hua. Acupuncture Therapy for Ischemic Stroke in Model of Rats. <i>Chinese Journal of Rehabilitation Theory and Practice</i> . 2009;15(3):214-215.                                                                                                                                    | Animal study                           |
| 81  | Sällström S, Kjendahl A, Osten PE, Stanghelle JK, Borchgrevink CF. Acupuncture therapy in stroke during the subacute phase. A randomized controlled trial. <i>Tidsskr Nor Laegeforen</i> . 1995;115(23):2884-2887.                                                                                | Not compared with sham control         |
| 82  | Johansson K, Lindgren I, Widner H, Johansson B, Wiklund I. Acupuncture therapy in stroke. Patients experience significant improvement. <i>Lakartidningen</i> . 1993;90(30-31):2597-2600.                                                                                                          | Not compared with sham control         |
| 83  | Cho KH, Jung WS, Park SU, Moon SK, Ko CN. Acupuncture Therapy on Stroke Rehabilitation in Korea. <i>Japanese Journal of Rehabilitation Medicine</i> . 2004;41(12):841-846.                                                                                                                        | Not clinical trial                     |
| 84  | Han S, Li C. Acupuncture Treatment for 68 Cases of Functional Impairment Induced by Cerebral Hemorrhage at the Convalescence Stage. <i>Journal of Traditional Chinese Medicine</i> . 2006;26(3):172-174.                                                                                          | Not compared with sham control         |
| 85  | Park JW, Koh HG, Kim CH. Acupuncture treatment for stroke patients. <i>The Journal of Korean Acupuncture and Moxibustion Society</i> . 1996;13(1):350-364.                                                                                                                                        | Not clinical trial                     |
| 86  | Ji Q, Xu Q, Zhou Y, Gu H, Zhang Y. Acupuncture Treatment of 35 Patients with Dysphagia due to Apoplectic Pseudobulbar Paralysis. <i>Shanghai Journal of Acupuncture and Moxibustion</i> . 2004;23(5):11-12.                                                                                       | Not compared with sham control         |
| 87  | Zeng H. Acupuncture treatment of acute cerebral infarction by the 'Three-Step-Needling' method. <i>Journal of Traditional Chinese Medicine</i> . 2006;26(1):13-16.                                                                                                                                | Uncontrolled trial                     |
| 88  | Lin Rong-yu, Wang En-long. Acupuncture Treatment of Acute Ischemic Stroke Clinical Observation. <i>Journal of Practical Traditional Chinese Internal Medicine</i> . 2009;23(3):90-91.                                                                                                             | Not compared with sham control         |
| 89  | Zhang WX, Li SC, Chen GB, Zhang QM, Wang YX. Acupuncture treatment of apoplectic hemiplegia. <i>Journal of Traditional Chinese Medicine</i> . 1987;7(3):157-160.                                                                                                                                  | Not randomized controlled trial        |
| 90  | Liu LL. Acupuncture Treatment of Bulbar Palsy. Report of 54 Cases. <i>Journal of Traditional Chinese Medicine</i> . 2000;20(1):30-32.                                                                                                                                                             | Complex therapy                        |
| 91  | Wang H. Acupuncture treatment of depressive syndromes after cerebral vascular accidents. <i>Journal of Traditional Chinese Medicine</i> . 2002;22(4):274-275.                                                                                                                                     | Uncontrolled trial                     |
| 92  | Schuler MS, Durdak C, Hol NM, et al. Acupuncture treatment of geriatric patients with ischemic stroke: a randomized, double-controlled, single-blind study. <i>J Am Geriatr Soc</i> . 2005;53(3):549-550.                                                                                         | Included                               |
| 93  | Guo Fang. Acupuncture Treatment of Swallowing Training after Stroke 42 Cases of Dysphagia. <i>Journal of Practical Traditional Chinese Internal Medicine</i> . 2009;23(3):83-84.                                                                                                                  | Uncontrolled trial                     |
| 94  | Hu J. ACUPUNCTURE TREATMENT OF WIND STROKE. <i>Journal of Traditional Chinese Medicine</i> . 1996;16(4):307-311.                                                                                                                                                                                  | Not focus on functional recovery       |
| 95  | Johansson K, Lindgren I, Gronvall E, Johansson BB. Acupuncture treatment in stroke patients. <i>Scand J Rehab Med</i> . 1992;suppl 26:158.                                                                                                                                                        | Not compared with sham control         |
| 96  | Yao LM, Gao FM. Acupuncture with Rehabilitation Therapy for Function Resume of Patient with Stroke. <i>Chinese Journal of Integrative Medicine on Cardio-Cerebrovascular Disease</i> . 2006;4(6):488-489.                                                                                         | Complex therapy                        |
| 97  | Zeng QW. Acupuncture, recovery training complex therapy stroke sickness. <i>Journal of Liaoning University of Traditional Chinese Medicine</i> . 2008;10(10):121-122.                                                                                                                             | Not clinical trial                     |
| 98  | Mutasem AH, Zi XH, Xiao B, Song Z, Tu QY. Acute and Subacute Phase of Cerebral Infarction After Treatment With Acupuncture and Medical Therapy. <i>American Journal of Infectious Diseases</i> . 2007;3(1):7-10.                                                                                  | Not randomized controlled trial        |
| 99  | Chang XR, Yan J, Fan L, et al. Advance on Research of Treating Hemiplegia after Stroke with Acupuncture and Rehabilitation. <i>Chinese Journal of Rehabilitation Theory and Practice</i> . 2008;14(4):352-355.                                                                                    | Not clinical trial                     |
| 100 | Ding J, Shi XM. Advances in Clinical and Experimental Studies on Acupuncture Treatment of Acute Cerebral Hemorrhage. <i>World Journal of Acupuncture-Moxibustion</i> . 2005;15(2):56-63.                                                                                                          | Not clinical trial                     |
| 101 | Zhang ZQ, Tan JL. Advances of studies on acupuncture and moxibustion for treatment of spastic paralysis after stroke. <i>Chinese Acupuncture and Moxibustion</i> . 2006;26(11):825-828.                                                                                                           | Not clinical trial                     |
| 102 | Hwee Ling Yen, William Chan. An East-West approach to the management of central post-stroke pain. <i>Cerebrovascular Diseases</i> . 2003;16(1):27-30.                                                                                                                                             | Not focus on functional recovery       |
| 103 | Liu H, Wang Y, Ren H et al. An effect of acupuncture on ADL and cognitive function in patients with ischemic stroke. <i>Chinese Journal of Rehabilitation Medicine</i> . 2006;21(5):444-448.                                                                                                      | Not compared with sham control         |
| 104 | He YZ, Han B, Hu J, Yuan L, Chen ZM, Li JM, Peng JX, Wang LN. An Observation on the Acupuncture Treatment of Ischemic Wind-Stroke with Different Lengths of Needle-retaining Time. <i>Journal of Traditional Chinese Medicine</i> . 2006;26(2):83-87.                                             | Compared two types of acupuncture      |
| 105 | Wu B, Chen XY, Song B. An Observation on Treating a Patient Suffered from Stroke with Swallow Disability by Acupuncture with Rehabilitation. <i>Chinese Medical Record</i> . 2006;7(9):56.                                                                                                        | Not randomized controlled trial        |
| 106 | Yin HX, Huang WS, Rao L, Zhou Y. Analysis of Using Acupuncture of Head, Acupuncture of Body, Manipulation and Dirigation Treat 61 Cases of a Stroke. <i>Modern Rehabilitation</i> . 1999;3(7):786-788.                                                                                            | Not randomized controlled trial        |
| 107 | Yin HX, Huang WS, Rao L, et al. Analysis on clinically curative effects of early using acupuncture, manipulation and cinesiotherapy on treatment for stroke hemiplegia. <i>Chinese Journal of Integrated Traditional and Western Medicine in Intensive and Critical Care</i> . 2000;7(5):302-304. | Complex therapy                        |
| 108 | Ha JY, Kim CH, Koh HK. Angiotensin converting enzyme(ACE) gene polymorphism in Korean stroke patients. <i>The Journal of Korean Acupuncture and Moxibustion Society</i> . 2003;20(2):161-172.                                                                                                     | Not related to efficacy of acupuncture |

|     |                                                                                                                                                                                                                                                                               |                                        |
|-----|-------------------------------------------------------------------------------------------------------------------------------------------------------------------------------------------------------------------------------------------------------------------------------|----------------------------------------|
| 109 | Moon SK, Whang YK, Park SU, Ko CN, Kim YS, Bae HS, Cho KH. Antispastic effect of electroacupuncture and moxibustion in stroke patients. <i>The American Journal of Chinese Medicine</i> . 2003;31(3):467-474.                                                                 | Not compared with sham control         |
| 110 | You JH, Kim YS, Kang SK. Antispastic Effect of Electroacupuncture on Spasticity in Stroke Patients. <i>The Journal of Korean Acupuncture and Moxibustion Society</i> . 1999;16(2):1-12.                                                                                       | Not randomized controlled trial        |
| 111 | Paek CH, So SW, Kim HS, Ahn KH, Nam SS, Park SK. Antispastic Effect of Transcutaneous Electrical Nerve Stimulation and Acupuncture in the Stroke Patients. <i>J of Korean Acad of Rehab Med</i> . 1997;21(6):1088-1097.                                                       | Not randomized controlled trial        |
| 112 | Kim YS. Antispastic effects of electroacupuncture, TENS and NMES in stroke patients. <i>The Journal of Korean Acupuncture and Moxibustion Society</i> . 2000;17(2):209-220.                                                                                                   | Not compared with sham control         |
| 113 | Guo J, Xie Y, Sun Q et al. Application of acupuncture in the early rehabilitation for stroke patients. <i>Chinese Journal of Rehabilitation Medicine</i> . 2005;20(1):40-43.                                                                                                  | Not compared with sham control         |
| 114 | Hao Li, Zhao XF, Li J. Approach to clinical trial design for acupuncture and moxibustion treatment of stroke. <i>Chinese Acupuncture &amp; Moxibustion</i> . 2009;29(1):56-58.                                                                                                | Not clinical trial                     |
| 115 | Zhang XL, Li J, Zhang MM, Yuan WM. Assessing the Reporting Quality of Randomized Controlled Trials on Acupuncture for Acute Ischemic Stroke Using the CONSORT Statement and STRICTA. <i>Chin J Evid-based Med</i> . 2006;6(8):586-590.                                        | Not clinical trial                     |
| 116 | Wang LP, Zhou W, Wang Y. Assessment and investigation of therapeutic effects of different needling methods for treatment of spastic state of post-cerebrovascular disease. <i>Chinese Acupuncture &amp; Moxibustion</i> . 2007;27(5):325-328.                                 | Compared two types of acupuncture      |
| 117 | Zeng HW. Assorted acupuncture and moxibustion combined with self-made Chinese herb recipe for improving the limbs spasticity and motor function in patients with stroke. <i>Chinese Journal of Clinical Rehabilitation</i> . 2005;9(17):126-127.                              | Not related to efficacy of acupuncture |
| 118 | Cui N, Zhou HF. Body Acupuncture Needle Eyes and Early Treatment of Stroke Referred to. <i>Journal of Practical Traditional Chinese Internal Medicine</i> . 2009;23(3):87-88.                                                                                                 | Uncontrolled trial                     |
| 119 | Zhi YJ, Xie YM, Zhao H, Wang YY. Brief talk on the problem and countermeasure in clinical trial design of acupuncture for treatment of stroke. <i>Chinese Acupuncture &amp; Moxibustion</i> . 2008;28(11):839-842.                                                            | Not clinical trial                     |
| 120 | Rorsman I, Johansson B. Can electroacupuncture or transcutaneous nerve stimulation influence cognitive and emotional outcome after stroke. <i>J Rehabil Med</i> . 2006;38:13-19.                                                                                              | Not compared with sham control         |
| 121 | Kim JH, Wui TS, Park EJ, Shin JC, Han SG, Cho MR, Ryu CR, Yoon YC, Chae WS. Case report of patients with HSP-hemiplegic shoulder pain-treated with ChunTaeSan in DongiBoGam. <i>The Journal of Clinical Thesis Korean Acupuncture and Moxibustion Society</i> . 2003:117-127. | Not related to efficacy of acupuncture |
| 122 | Kim JW, Yu BC, Choi SM, An JJ, Jo HK, Yoo HR, Kim YS. Case-Control Study on Social Risk Factors of Stroke in Korea. <i>Korean J. Oriental Physiology &amp; Pathology</i> . 2007;21(6):1631-1636.                                                                              | Not randomized controlled trial        |
| 123 | Seo JC, Kim YM, Yin CS, Han SW, Jung TY, Byun JS, Leem KH, Kim EH, Koh HK, Kim CH. Catalase gene polymorphism in Korean stroke patients - 251 case control study. <i>The Journal of Korean Acupuncture and Moxibustion Society</i> . 2002;19(4):183-189.                      | Not related to efficacy of acupuncture |
| 124 | Gao H, Xiang B, Wang C. Centrally administered nociceptin/orphanin FQ and the neuroprotective effect of electroacupuncture against cerebral ischemia following middle cerebral artery occlusion/reperfusion in rats. <i>MED ACUPUNCT</i> . 2009;21(2):99.                     | Animal study                           |
| 125 | Zhang HX, Zhou L, Zhang TF, Huang GF. Changes of blood biochemical indexes in stroke patients after scalp acupuncture; A randomized controlled observation. <i>Neural Regen Res</i> . 2006;1(7):630-633.                                                                      | Compared two types of acupuncture      |
| 126 | Li DR, Wu GC, Lin JL, Wang XL, Lai BH, Zou GY. Changes of cerebral blood flow and limb motor function in patients with acute ischemic stroke after scalp acupuncture treatment. <i>Chinese Journal of Clinical Rehabilitation</i> . 2005;9(25):138-139.                       | Not compared with sham control         |
| 127 | Wu J, Fu LX, Zhao H, Gao SH, Wang WZ, Zhang JL, Li P, Zhao JG. Changes of myocardial zymogram induced by acute stroke and intervention of acupuncture. <i>Chinese Journal of Clinical Rehabilitation</i> . 2006;10(7):1-3.                                                    | Compared two types of acupuncture      |
| 128 | Xu B, Tian GP, Zhu F, Wang ZW. Changes of neurological defect and laboratory related indexes in patients with acute cerebral infarction after ultrasonic electric cluster acupuncture therapy. <i>Chinese Journal of Clinical Rehabilitation</i> . 2006;10(15):19-22.         | Not compared with sham control         |
| 129 | Yu CD, Wu BH, Hong AH, Bai JY, Yu Z. Changes of Serum MDA Content and Neurological Rehabilitation in Cerebral Infarction Patients Treated with Scalp-acupuncture plus Medication. <i>Acupuncture Research</i> . 2004;29(3):222-226.                                           | Not compared with sham control         |
| 130 | HELEN LINDFIELD. Chronic shoulder pain in stroke. Are we missing the acupoint. <i>Physiotherapy Research International</i> . 2002;7(1):44-50.                                                                                                                                 | Not focus on functional recovery       |
| 131 | Shen B. Clinical Observation on acupuncture points injects for instauration of CVA Patients. <i>ATTEND TO PRACTICE AND RESEARCH</i> . 2005;2(3):5-6.                                                                                                                          | Not related to efficacy of acupuncture |
| 132 | Tian FW, Gou CY, Li N. Clinic research of stroke hemiplegia treated by the different stage balance acupuncture project. <i>Journal of Clinical Acupuncture and Moxibustion</i> . 2004;20(4):34-35.                                                                            | Compared two types of acupuncture      |
| 133 | Yun JM, Lee MG, Park SW, Lee SW, Ryu HH, Lee SE, Kim YJ, Son JW, Rhim EK, Kim SN, Lee I, Moon BS. Clinical acoustic study of acupuncture therapy effects on post-stroke dysarthria. <i>Korean Journal of Oriental Internal Medicine</i> . 2005;26(3):660-669.                 | Not focus on functional recovery       |
| 134 | Wang SZ, Zhu SH, Lin MX, Shen QW. Clinical Analysis of Acupuncture Treatment for Stroke with Upper Limb Paralysis. <i>Shanghai Journal of Acupuncture and Moxibustion</i> . 2008;27(11):8-9.                                                                                  | Compared two types of acupuncture      |

|     |                                                                                                                                                                                                                                                                                                |                                        |
|-----|------------------------------------------------------------------------------------------------------------------------------------------------------------------------------------------------------------------------------------------------------------------------------------------------|----------------------------------------|
| 135 | Wang J, Wang Z. Clinical analysis of early rehabilitation for hemiplegia of cerebrovascular accident. Chinese Journal of Primary Medicine Pharmacy. 2002;9(8):686-687.                                                                                                                         | Not related to efficacy of acupuncture |
| 136 | Hou BC, Tian WZ. Clinical application and study of eye-acupuncture in the treatment of paralysis following stroke. Chinese Journal of Clinical Rehabilitation. 2004;8(13):2518-2519.                                                                                                           | Not clinical trial                     |
| 137 | Mutasem AH, Zi XH. Clinical Comparison of Acupuncture Treatment on Acute and Subacute Phase of Cerebral Infarction. J Clin Res. 2007;24(3):443-446.                                                                                                                                            | Compared two types of acupuncture      |
| 138 | Song MS, Kim YH, Jang SG, Kim JH, Yim YK, Kang JH, Park YS, Lee H, Lee BR, Hong KE, Kim YI, Song IS. Clinical comparison studies on 20 cases of stroke patients with dysarthria by Sa-Am & General acupuncture. The Journal of Korean Acupuncture and Moxibustion Society. 2003;20(6):160-167. | Not randomized controlled trial        |
| 139 | Jin MY, Li Z, Liu SY, et al. Clinical effect observation of stroke treated with early acupuncture rehabilitation treatment;425 cases reported. Journal of Clinical Acupuncture and Moxibustion. 2003;19(11):10-11.                                                                             | Complex therapy                        |
| 140 | Tian Y, Kang LG. Clinical effects of electroacupuncture stimulation on treatment of stroke-induced limb spasm. Neural Regeneration Research. 2008;3(1):89-93.                                                                                                                                  | Not clinical trial                     |
| 141 | Xiong J, Ning L, Bian J. Clinical effects of Xingnao Kaiqiao acupuncture on neurological impairment following cerebral infarction. Neural regeneration research. 2008;3(3):272.                                                                                                                | Not randomized controlled trial        |
| 142 | Xiong J, Zhang W, Li Y, Guo J, Shi X. Clinical efficacy of Xingnao Kaiqiao acupuncture therapy on neurological impairment in superearly stage acute cerebral infarction. Medical Journal of the Chinese People's Armed Police Force. 2006;17(6):416-417.                                       | Not compared with sham control         |
| 143 | Jin Z, Gu F, Chen R, Cheng J. Clinical Investigation of Acupuncture Effect on Acute Cerebral Infarction. Acupuncture Research. 1999;1:5-7.                                                                                                                                                     | Not compared with sham control         |
| 144 | Jang KJ. Clinical observation for CVA. The Journal of Korean Acupuncture and Moxibustion Society. 1997;14(2):35-45.                                                                                                                                                                            | Not related to efficacy of acupuncture |
| 145 | Ao JB, Li XY, Peng L, et al. Clinical Observation of 80 Cases of Spastic Hemiplegia of Stroke Treated by Warm Acupuncture-Moxibustion. Chinese Journal of Information on Traditional Chinese Medicine. 2008;15(7):10-11.                                                                       | Compared two types of acupuncture      |
| 146 | He XH. Clinical Observation of Acupuncture in Treating Upper Limb Spasticity After Stroke. Shanghai Journal of Traditional Chinese Medicine. 2008;42(12):45-46.                                                                                                                                | Uncontrolled trial                     |
| 147 | Yuan SL, Yu MZ, Zhu ZC. Clinical Observation of Cerebral Infarction in Different Sites Treated by Acupuncture Combined with Chinese Medicine. SHANGHAI JOURNAL OF TRADITIONAL CHINESE MEDICINE. 2000;10:26-28.                                                                                 | Not compared with sham control         |
| 148 | Byun CH, Lee DY. Clinical Observation of Cerebrovascular Accident associated with Stupor or Coma by treatment of the Acupuncture and herb medicine. The bulletin of the Daegu Haany University Jeahan Oriental Medical Academy. 1975;2:7-18.                                                   | Uncontrolled trial                     |
| 149 | Xie K, Liu MQ. Clinical observation of electroacupuncture and rehabilitation training in treating cerebral infarction. Journal of acupuncture and tuina science. 2009;7(3):140-142.                                                                                                            | Complex therapy                        |
| 150 | Wang BQ, Zhao JH, Zhang YM. Clinical observation of head and body acupuncture and moxibustion on stroke. Chin J Rehabil Theory Practice. 2004;10(8):490-491.                                                                                                                                   | Compared two types of acupuncture      |
| 151 | Li SZ, Han M, Pi M, Cai T. Clinical observation of influence of xingnaokaiqiao acupuncture on CRP of patients with acute cerebral infarction and nursing. Modern Nursing. 2006;12(17):1632-1634.                                                                                               | Compared two types of acupuncture      |
| 152 | Tang Q, Chen HJ, Li XJ. Clinical observation of scalp acupuncture combination of high-potential treatment on post-stroke shoulder pain. Journal of Clinical Acupuncture and Moxibustion. 2009;25(1):19-20.                                                                                     | Not compared with sham control         |
| 153 | Kim DM, Kim HK, Ha SY, Kim YS, Nam SS. Clinical observation of stroke patients admitted to hospital of oriental medicine. The Journal of Korean Acupuncture and Moxibustion Society. 2007;24(5):43-52.                                                                                         | Not related to efficacy of acupuncture |
| 154 | Zhang JL. Clinical Observation of the Combined Treatments of the Acupuncture and Moxibustion for Limb Dysfunction after Acute Stroke. Chinese Journal of Rehabilitation. 2007;22(5):321-322.                                                                                                   | Complex therapy                        |
| 155 | Yi CJ, Huang DQ. Clinical observation of the therapeutic effect of rehabilitation training, Chinese medicine and acupuncture in stroke patients. Chin J Phys Med Rehabil. 2002;24(10):587-589.                                                                                                 | Not related to efficacy of acupuncture |
| 156 | Zhou L, Gao Y, Zou YH. Clinical observation on 41 cases of acute ischemic stroke treated with comprehensive therapeutic plan. JOURNAL OF BEIJING UNIVERSITY OF TRADITIONAL CHINESE MEDICINE. 2006;29(1):46-51.                                                                                 | Not related to efficacy of acupuncture |
| 157 | Wang DS, Wang S, Kong LL, Wang WY, Cui XM. [Clinical observation on abdominal electroacupuncture for treatment of poststroke constipation]. Chinese Acupuncture and Moxibustion. 2008;28(1):7-9.                                                                                               | Not compared with sham control         |
| 158 | Li J. Clinical observation on acupuncture for treatment of aphasia due to ischemic stroke at the early stage. Chinese Acupuncture and Moxibustion. 2005;25(11):760-762.                                                                                                                        | Not compared with sham control         |
| 159 | Yang L, Xu S. Clinical Observation on Acupuncture for Treatment of Hemiparalysis after Cerebral Haemorrhage's Operation. Acupuncture Research. 1994;Z1:118-119.                                                                                                                                | Not compared with sham control         |
| 160 | Li DM, Li WD, Wei LH, Zhao Y, Lu HZ. Clinical observation on acupuncture therapy for cerebral hemorrhage. Journal of Traditional Chinese Medicine. 1989;9(2):9-13.                                                                                                                             | Compared two types of acupuncture      |

|     |                                                                                                                                                                                                                                                                                             |                                        |
|-----|---------------------------------------------------------------------------------------------------------------------------------------------------------------------------------------------------------------------------------------------------------------------------------------------|----------------------------------------|
| 161 | Pang Y. Clinical Observation on Acupuncture Treatment of Ischemic Apoplexy by Nourishing the kidney and Regulating the Du Channel. <i>Journal of Traditional Chinese Medicine</i> . 2003;23(4):286-289.                                                                                     | Compared two types of acupuncture      |
| 162 | Wang DS, Wang S, Shang YJ, Cui XM. Clinical observation on acupuncture with pushing manipulation for treatment of finger flexion in the patient of poststroke. <i>Chinese Acupuncture &amp; Moxibustion</i> . 2008;28(4):267-269.                                                           | Compared two types of acupuncture      |
| 163 | Li N. Clinical Observation on Comprehensive Therapy Treatment Stroke Aphasia. <i>Liaoning Journal of Traditional Chinese Medicine</i> . 2007;34(9):1250-1251.                                                                                                                               | Not related to efficacy of acupuncture |
| 164 | Duan MZ, Li XR. Clinical observation on curative effect of acupuncture therapy of waking-up combined with clipping the ridge for curing spasticity of hemiparalysis after stroke. <i>Journal of Clinical Acupuncture and Moxibustion</i> . 2008;24(10):7-10.                                | Compared two types of acupuncture      |
| 165 | Li T, Zhao JG, Tian G, Zhang L, Liu SJ. Clinical observation on effect of acupuncture on nervous functions of the patient after operation of hypertensive cerebral hemorrhage. <i>Chinese Acupuncture and Moxibustion</i> . 2006;26(4):247-249.                                             | Not compared with sham control         |
| 166 | Kwon OH, Choi YT, Lee YH. Clinical observation on hemiplegia by computerized thermography. <i>The Journal of Korean Acupuncture and Moxibustion Society</i> . 1996;13(2):23-37.                                                                                                             | Uncontrolled trial                     |
| 167 | Lei LM, Pang J, Chen JX, Peng DH, Wang ZT. Clinical observation on hemiplegia early rehabilitation effects of different acupuncture programs. <i>Chinese Acupuncture &amp; Moxibustion</i> . 2005;25(4):233-236.                                                                            | Compared two types of acupuncture      |
| 168 | Wu P, Liu S. Clinical observation on post-stroke anxiety neurosis treated by acupuncture. <i>Journal of Traditional Chinese Medicine</i> . 2008;28(3):186-188.                                                                                                                              | Not compared with sham control         |
| 169 | Wu X, Zou Q, Cai D et al. Clinical Observation on Rehabilitation of Nervous Functions in the Patient of Stroke at Acute Stage Treated with Acupuncture. <i>Chinese Acupuncture and Moxibustion</i> . 2002;22(11):726-728.                                                                   | Not compared with sham control         |
| 170 | Zhang ZW, Li WX, Xue WH. Clinical observation on shallow needling for treatment of acute intracerebral hemorrhage. <i>Chinese Acupuncture and Moxibustion</i> . 2005;25(4):246-8.                                                                                                           | Not compared with sham control         |
| 171 | Zhao LQ. Clinical observation on the effects of acupuncture method of inducing resuscitation on the level of cytokines in patients with ischemic stroke. <i>China Practical Medicine</i> . 2008;3(27):19-20.                                                                                | Compared two types of acupuncture      |
| 172 | Pi M, Rao XD, Cao XM, Wu LX, Peng JH, Liu YS, Yu HB, Yang ZX. Clinical Observation on the Effects of Acupuncture Method of Inducing Resuscitation on the Level of Inflammatory Cell Factor in Patients with Acute Cerebral Infraction. <i>Guiding Journal of TCM</i> . 2007;13(7):63-64,74. | Compared two types of acupuncture      |
| 173 | Bi Y, Han JX. Clinical Observation on the Method of Needling 'Nei Da Ying' Channel for treatment of Tongue Dyskinesia Post-stroke. <i>Journal of Clinical Acupuncture and Moxibustion</i> . 2006;22(7):7-10.                                                                                | Compared two types of acupuncture      |
| 174 | Chen M. Clinical observation on the results of treatment of shoulder-hand syndrome due to cerebral stroke with acupuncture. <i>China Tropical Medicine</i> . 2008;8(10):1781-1782.                                                                                                          | Not compared with sham control         |
| 175 | Sui M. Clinical Observation on the Therapeutic Effect of Acupuncture of Hand-Shaoyang Meridian Acupoints for Treatment of Upper limb Spasm in Stroke Patients. <i>Acupuncture Research</i> . 2001;26(2):131-133.                                                                            | Compared two types of acupuncture      |
| 176 | Xia Y, Zhu TZ, Song YG, Yang L, Feng ZY, Ji YJ, Chen WW, Yuan H, Gao JX, Gao W. Clinical Observation on the Treatment of 80 Ischemic Stroke Cases by Scalp Acupuncture Plus CT Image Location. <i>Shanghai Journal of Acupuncture and Moxibustion</i> . 2004;23(10):10-12.                  | Not related to efficacy of acupuncture |
| 177 | Wu X, Yang Y, Wang Y, Wang S, Liu Y. CLINICAL OBSERVATION ON THE TREATMENT OF ACUTE CEREBRAL INFARCTION WITH SCALP-ACUPUNCTURE. <i>World journal of acupuncture-moxibustion</i> . 2001;11(3):24-27.                                                                                         | Not compared with sham control         |
| 178 | Zheng ZY, Zhao CR, Ji Q, Xu QF, Zheng Y, Liu TY. Clinical Observation on the Treatment of Cerebral Infarction by the Early Traditional Chinese Medicine Combined Rehabilitation. <i>Liaoning Journal of Traditional Chinese Medicine</i> . 2007;34(3):304-305.                              | Not related to efficacy of acupuncture |
| 179 | Ning ZH, Xie M, Feng LM. Clinical Observation on the Treatment of Post-apoplectic Paralytic Limb Swelling with Acupuncture plus Moxa and TDP Irradiation. <i>Shanghai Journal of Acupuncture and Moxibustion</i> . 2005;24(2):11-12.                                                        | Complex therapy                        |
| 180 | Lun X, Peng ZF, Peng SZ. Clinical observation on the treatment of sequelae of stroke by needling temporal three points. <i>Journal of Clinical Acupuncture and Moxibustion</i> . 1999;15(4):8-9.                                                                                            | Not compared with sham control         |
| 181 | Wang CY, Wang WY. Clinical Observation on the Variations of PAG, PLT, MPV in Patients of Cerebral Infarction Treated by Acupoint Injection with Red Peong Root Liqueur and Acupuncture. <i>Chinese Journal of Information on Traditional Chinese Medicine</i> . 2002;9(6):15-17.            | Not related to efficacy of acupuncture |
| 182 | Zhang WL, Feng LH, Jia XH, Fan JP, Xu Y. Clinical Observation on Therapeutic Effects of the Point-Penetrating Method in Acupuncture Treatment of Spastic Hemiparalysis Due to Cerebrovascular Disorders. <i>Journal of Traditional Chinese Medicine</i> . 2007;27(3):170-172.               | Compared two types of acupuncture      |
| 183 | Li Q, Wang ZH, Ye J, Zhu XY. Clinical observation on tongue acupuncture for treatment of stroke. <i>Chinese Acupuncture &amp; Moxibustion</i> . 2005;25(11):820-822.                                                                                                                        | Compared two types of acupuncture      |
| 184 | Bao H. Clinical Observation on Treatment of Brain Stroke with Acupuncture Therapy. <i>Journal of Clinical Acupuncture and Moxibustion</i> . 2003;19(2):21-22.                                                                                                                               | Not compared with sham control         |
| 185 | Zhang RY. Clinical Observation on Treatment of Cerebral Infarction by Combined Therapy of Acupuncture with Extremities Tissue Separating Manipulation. <i>Chinese journal of integrated traditional and Western medicine</i> . 2005;25(6):496-498.                                          | Not related to efficacy of acupuncture |
| 186 | Luo WP, Tan JL, Huang HY. [Clinical observation on treatment of cerebral infarction-induced broca aphasia by Tiaoshen Fuyin acupuncture therapy combined with language training]. <i>Chinese Acupuncture and Moxibustion</i> . 2008;28(3):171-175.                                          | Not compared with sham control         |

|     |                                                                                                                                                                                                                                                                      |                                        |
|-----|----------------------------------------------------------------------------------------------------------------------------------------------------------------------------------------------------------------------------------------------------------------------|----------------------------------------|
| 187 | Li JL. Clinical Observations on Acupuncture Treatment of 68 Patients with Postapoplectic Dysphasia. Shanghai Journal of Acupuncture and Moxibustion. 2003;22(10):5-6.                                                                                                | Not compared with sham control         |
| 188 | Zhu SH, Lin MX, Wang SZ. Clinical observations on acupuncture treatment of acute cerebral infarction. Shanghai Journal of Acupuncture and Moxibustion. 2006;25(9):11-12.                                                                                             | Not compared with sham control         |
| 189 | Fan CF, Jiang HY, Wu LZ. Clinical Observations on Acupuncture Treatment of Postapoplectic Dysphagia. Shanghai Journal of Acupuncture and Moxibustion. 2007;26(7):6-7.                                                                                                | Not compared with sham control         |
| 190 | Liao HW. Clinical observations on the efficacy of occupational therapy plus acupuncture for treating reflex sympathetic dystrophy. Shanghai Journal of Acupuncture and Moxibustion. 2006;25(3):9-10.                                                                 | Not related to efficacy of acupuncture |
| 191 | Zhao X, Song W, Li Q, Zhang H, Zhou Y, Zhang L, Guo Y. Clinical Observations on the Treatment of Apoplectic Pseudobulbar Paralysis by Brain-refreshing and Orifice-opening Acupuncture. Shanghai Journal of Acupuncture and Moxibustion. 2004;23(5):8-10.            | Not compared with sham control         |
| 192 | Sun G, Zhang YF. Clinical Observations on the Treatment of Cerebral Infarction-caused Paralytic strabismus with Scalp and Body Acupuncture. Shanghai Journal of Acupuncture and Moxibustion. 2005;24(2):15-16.                                                       | Not compared with sham control         |
| 193 | Li Z. Clinical Observations on Treatment of Acute-stage Cerebral Hemorrhage Patients by Shi's Stroke Unit Therapy. Shanghai Journal of Acupuncture and Moxibustion. 2007;26(10):6-8.                                                                                 | Not related to efficacy of acupuncture |
| 194 | Li GC, Zhai X. Clinical observations on treatment of apoplectic aphasia by acupuncture plus rehabilitation. Shanghai Journal of Acupuncture and Moxibustion. 2006;25(9):13-14.                                                                                       | Not compared with sham control         |
| 195 | Huang F, Liu Y, Yao GX, Zhou FX, Wang XY, Yang D. Clinical Observations on Treatment of Ischemic Stroke with Acupuncture at BackShu Points. Shanghai Journal of Acupuncture and Moxibustion. 2008;27(10):4-7.                                                        | Included                               |
| 196 | Cheng Y, Zhao JJ. Clinical Random Control Study of Abdomen Acupuncture on Treating the Post Stroke Depression. Chinese archives of Traditional Chinese Medicine. 2007;25(9):1888-1891.                                                                               | Not compared with sham control         |
| 197 | Lei H, Ai SC, Wen L. Clinical Report on Improvement of Mobility of Affected Shoulder Joint Caused by Acute Cerebral Infarction Treated With Acupuncture and Massage. World journal of acupuncture-moxibustion. 2008;18(1):29-32.                                     | Complex therapy                        |
| 198 | Chen LD. Clinical Research of Rehabilitative Treatment to Cognitive Handicap in Cerebral Infarction Patients. Journal of Fujian College of TCM. 2004;14(6):31-33.                                                                                                    | Not related to efficacy of acupuncture |
| 199 | Kang BJ, Moon SK, Ko CN, Cho KH, Kim YS, Bae HS, Lee KS. Clinical Research on the Depressing Effect of Acupuncture Therapy at Kokchi and Chocksamni in Acute Stroke Patients with Hypertension. Journal of Oriental Medicine. 1998;3(1):43-50.                       | Not randomized controlled trial        |
| 200 | Gao JP. CLINICAL RESEARCH ON THE REHABILITATING EFFECT OF ACUPUNCTURE PLUS KINETOTHERAPY ON PATIENTS WITH HEMIPLEGIA AFTER STROKE. Journal of Mudanjiang Medical College. 2003;24(5):16-18.                                                                          | Complex therapy                        |
| 201 | Ko CN, Moon SK, Cho KH, Kim YS, Bae HS, Lee KS. Clinical Research on the rehabilitation of Stroke patients's motor ability. Korean Journal of Oriental medicine. 2002;3(1):107-119.                                                                                  | Uncontrolled trial                     |
| 202 | Wang LC, Zhou ZL, Guo JK, Wu YX. Clinical Research on the Treatment of Acute Cerebral Infarction with Acupuncture Approach "Mind Regulation & Meridian collateral Dredging". Acupuncture Research. 2001;26(1):32-34.                                                 | Compared two types of acupuncture      |
| 203 | Zhou WY, Zhao JG, Han YY, Zhao H, Gao Y. Clinical study of acupuncture and moxibustion for preventing nosocomial infection in the patient with acute cerebrovascular disease. Chinese Acupuncture & Moxibustion. 2008;28(2):91-94.                                   | Complex therapy                        |
| 204 | Kim JD, Kwon JN, Kim YG, Kim JW, Sa EH, Min SS, Hong SH, Lee SH, Kim JK. Clinical study of Korean medical treatment and Korean-Western medical treatment on acute ischemic stroke patients. Korean Journal of Oriental Physiology and pathology. 2007;21(2):543-547. | Not related to efficacy of acupuncture |
| 205 | Youn HM, Ahn CB, Song CH, Son IS, Jang KJ. Clinical study of stroke type. The Journal of Korean Acupuncture and Moxibustion Society. 2003;20(2):29-41.                                                                                                               | Uncontrolled trial                     |
| 206 | Lian ZJ, Zhao JD, Zhang TW. Clinical Study of Treating Ischemic Cerebral Infarction with the 'Head-hand-foot triple acupuncture kinesitherapy'. Chinese Archives of Traditional Chinese Medicine. 2007;25(4):840-843.                                                | Complex therapy                        |
| 207 | Wang L. Clinical Study on 70 Cases of Acute Ischemic Cerebrovascular Syndrome Treated by Acupuncture. Journal of Traditional Chinese Medicine. 2008;49(3):239-241.                                                                                                   | Not compared with sham control         |
| 208 | Li L, Zheng P, Chen X. Clinical study on acupuncture and ischemic stroke. Journal of acupuncture and tuina science. 2009;7(3):137-139.                                                                                                                               | Not compared with sham control         |
| 209 | Lin FY, Li HM, Jin YY et al. Clinical study on acupuncture combined with deglutition training for moderate disorders at the chronic stage of apoplexy. Journal of Clinical Acupuncture and Moxibustion. 2007;23(2):5-6.                                              | Not compared with sham control         |
| 210 | Shang Y, Ma C, Cai Y, Wang D, kong L. Clinical study on acupuncture combined with rehabilitation therapy for treatment of poststroke shoulder-hand syndrome. Chinese Acupuncture and Moxibustion. 2008;28(5):331-333.                                                | Not compared with sham control         |
| 211 | Zhang P, Yao H, Zhou H, et al. Clinical study on acupuncture combined with swallowing training for treating dysphagic patients with stroke. Chinese Journal of Rehabilitation Medicine. 2007;22(11):989-993.                                                         | Not compared with sham control         |
| 212 | He X, Lai X, Tan J, Wang B. Clinical study on acupuncture in the treatment of post-stroke depression with method of activating the Du meridian and clearing the mind. World journal of acupuncture-moxibustion. 2006;16(3):8-27.                                     | Not compared with sham control         |
| 213 | Cui XH, Rong LQ, Wei X, et al. Clinical Study on Acupuncture Method of Inducing Resuscitation For Cerebrovascular Disease. Applied Journal of General Practice. 2005;3(4):370-371.                                                                                   | Compared two types of acupuncture      |



|     |                                                                                                                                                                                                                                                                                                                |                                   |
|-----|----------------------------------------------------------------------------------------------------------------------------------------------------------------------------------------------------------------------------------------------------------------------------------------------------------------|-----------------------------------|
| 214 | Shi B, Guo Z, jiang J, et al. Clinical study on early rehabilitation and acupuncture of acute stroke. Chin J Rehabil Theory Practice. 2001;7(1):10-12.                                                                                                                                                         | Not compared with sham control    |
| 215 | So WR, Park WT, Lee SH, Sin KH, Roh JD, Choi SW, Kim JG. Clinical Study on Effect of Auricular acupuncture therapy and Auricular acupuncture therapy with common acupuncture therapy(Shinmun HT7) on Insomnia in stroke patients. The Journal of Korean Acupuncture and Moxibustion Society. 2003;20(5):38-49. | Not randomized controlled trial   |
| 216 | Heo SW, Kwon MJ, Kim HG, Jung KK, Kim SM, Min YK, Ahn CB, Song CH, Youn HM, Jang KJ. Clinical study on effect of ginger herbal acupuncture therapy on shoulder pain of paralytic patients. The Journal of Korean Acupuncture and Moxibustion Society. 2006;23(5):145-154.                                      | Pharmacopuncture                  |
| 217 | Li J, Xiao J, Dong G. Clinical Study on Effect of Scalp Acupuncture in Treating Acute Cerebral Hemorrhage. Chinese Journal of Integrative Medicine. 1999;19(4):203-205.                                                                                                                                        | Not compared with sham control    |
| 218 | Wei XY. Clinical study on electroacupuncture treatment of apoplectic hemiplegia shoulder-hand syndrome. Shanghai Journal of Acupuncture and Moxibustion. 2006;25(7):13-14.                                                                                                                                     | Compared two types of acupuncture |
| 219 | Wu Z, Gao WB. Clinical Study on Electroacupuncture Treatment of Spastic Paralysis Following Cerebral Infarction. Shanghai Journal of Acupuncture and Moxibustion. 2007;26(4):10-11.                                                                                                                            | Compared two types of acupuncture |
| 220 | Li T, Tian G, Zhang L, Wei G, Ma Q, Han J. Clinical study on the effect of acupuncture on the neural function in extensive cerebral infarction-postoperative patients. Shanghai Journal of Acupuncture and Moxibustion. 2006;25(9):3-5.                                                                        | Not compared with sham control    |
| 221 | Jeong KS, Kim SH, Park SK, Lim HJ, Yoon HS, Ahn HJ. Clinical study on the effect of bee venom acupuncture therapy on the post-stroke pain. The Journal of Korean Acupuncture and Moxibustion Society. 2005;22(3):69-75.                                                                                        | Pharmacopuncture                  |
| 222 | Yu YG, Woo YS, Choi IS, Seo SH, Jeong JO, Park SW, Kim SH, Kim YK, Kwon JN. Clinical study on the functional independence in stroke. Korean Journal of Oriental Physiology and pathology. 2003;17(6):1552-1559.                                                                                                | Uncontrolled trial                |
| 223 | Zhu H, Zhang J, Wang Y, Wang K. Clinical Study on the Protective Effect of Acupuncture of BL-15 and BL-14 Combined with Medication on Cardio-cerebral Functions in Patients with Acute Ischemic Stroke. Acupuncture Research. 2003;28(3):203-209.                                                              | Not compared with sham control    |
| 224 | Ko SG, Oh HR. Clinical study on the recovery of motor function using Modified Barthel Index(MBI) and Motor Assessment Scale(MAS) in acute stage stroke patients. J. of Oriental. Chr. Dis. 1997;3(1):206-230.                                                                                                  | Uncontrolled trial                |
| 225 | Li YH, Jin R. Clinical Study on the Sequelae of Cerebral Vascular Accident Treated with Temporal-point Acupuncture. Acupuncture Research. 1994;19(2):4-7.                                                                                                                                                      | Compared two types of acupuncture |
| 226 | HE J, Shen P. Clinical Study on the Therapeutic Effect of Acupuncture in the Treatment of Post-stroke Depression. Acupuncture Research. 2007;32(1):58-61.                                                                                                                                                      | Not compared with sham control    |
| 227 | Zhu W, Ni J, Bao C, Dong G, Tang Q. Clinical study on the treatment of 28 acute cerebral hemorrhage patients by scalp point-through-point acupuncture plus rehabilitation therapy. Shanghai Journal of Acupuncture and Moxibustion. 2006;25(5):5-7.                                                            | Not compared with sham control    |
| 228 | Zhu S, Shen Q, Lin M, Wang S, Zhang Q. CLINICAL STUDY ON THE TREATMENT OF ACUTE CEREBRAL INFARCTION WITH ACUPUNCTURE COMBINED WITH MEDICINES. World journal of acupuncture-moxibustion. 2005;15(3):8-12.                                                                                                       | Not compared with sham control    |
| 229 | Jiang Z, Gao L, Li C, Li J. CLINICAL STUDY ON THE TREATMENT OF POST-STROKE DEPRESSION WITH ELECTROACUPUNCTURE OF "NIWAN BAZHEN" POINTS. World journal of acupuncture-moxibustion. 2007;17(1):11-16.                                                                                                            | Not compared with sham control    |
| 230 | Li YK, Hu KM, Li CD, et al. Clinical Study on the Treatment of Stroke by Head Electro-acupuncture with International Standardization Program. Chin J Rehabilitation. 1997;12(2):54-58.                                                                                                                         | Compared two types of acupuncture |
| 231 | Zhu H, Zhang J, Wang Y, Wang K. CLINICAL STUDY ON TREATMENT OF ACUTE ISCHEMIC STROKE WITH ACUPUNCTURE OF ACUPOINTS OF THE PERICARDIUM MERIDIAN AND THE HEART MERIDIAN. World journal of acupuncture-moxibustion. 2002;12(4):3-11.                                                                              | Not compared with sham control    |
| 232 | Sun HL, Li XM. Clinical Study on Treatment of Cerebral Apoplexy with Penetration Needling of Scalp Acupoints. Chinese Acupuncture & Moxibustion. 2001;21(5):275-278.                                                                                                                                           | Compared two types of acupuncture |
| 233 | Li Y, Pang Y, Zhou ZC. Clinical study on treatment of ischemic stroke by kidney-reinforcing and Du channel-regulating acupuncture method. Shanghai Journal of Acupuncture and Moxibustion. 2006;25(7):7-9.                                                                                                     | Compared two types of acupuncture |
| 234 | Han X. CLINICAL STUDY ON TREATMENT OF SENILE STROKE PATIENTS BY ACUPUNCTURE PLUS CHINESE MEDICINAL HERBS. World journal of acupuncture-moxibustion. 2002;12(2):12-16.                                                                                                                                          | Not compared with sham control    |
| 235 | Liu H, Zhang GP, Song SJ, Ding MP, Zhou JF, Bie XD, Liu JR, Zhang Y, Li ZH, Gao HF, Liu GG, Fei LT. Clinical Study on Zhuyu Tongfu (□□□□) Serial Recipe Combined with Acupuncture and Massage in Treating Hypertensive Cerebral Hemorrhage. Chin J Integr Med. 2005;11(3):167-172.                             | Complex therapy                   |
| 236 | Lee SH, Lee YH. Clinical study with Thermography on shoulder hand syndrome after stroke. Journal of Korean Oriental Medicine. 1997;18(1):25-39.                                                                                                                                                                | Compared two types of acupuncture |
| 237 | Shi Y. Clinical Treatment on Acupuncture Combined with Modern Therapy of Medical Rehabilitation for Stroke Patients. Journal of yunnan College of Traditional Chinese Medicine. 2007;30(2):47-49.                                                                                                              | Not compared with sham control    |

|     |                                                                                                                                                                                                                                                                                          |                                        |
|-----|------------------------------------------------------------------------------------------------------------------------------------------------------------------------------------------------------------------------------------------------------------------------------------------|----------------------------------------|
| 238 | Zhang BL, Wang YL, Gao Y, Cao XL, Gao L, Cui DD, Mao BY, Li T, Fu CR, Wu D, Hu XJ, Lin PZ, Han JX. Clinical trial and evaluation on comprehensive treatment on attack in acute stage; report of 522 cases. <i>Chin Crit Care Med.</i> 2005;17(5):259-263.                                | Complex therapy                        |
| 239 | Wong A, Su TY, Tang FT, Cheng PT, Liaw MY. Clinical trial of electrical acupuncture on hemiplegic stroke patients. <i>Am J Phys Med Rehabil.</i> 1999;78(2):117-122.                                                                                                                     | Not compared with sham control         |
| 240 | Lee SH, Shin SU, Hwang JS, Shin HD. Clinical trials for rehabilitation of stroke patients by the acupuncture treatment. <i>The Journal of Korea CHUNA Manual Medicine.</i> 2002;3(1):55-64.                                                                                              | Uncontrolled trial                     |
| 241 | Lu L, Shen L, et al. Clinical study on the Treatment of Acupuncture on Cerebral Infarction with Upper Extremity Motor Dysfunction. <i>Zhejiang Journal of Integrated Traditional Chinese and Western Medicine.</i> 2003;13(1):14-16.                                                     | Not compared with sham control         |
| 242 | Guo YQ, Chen LY, Fu WB, Qu AH, Ou XM, Li WX, Fan Li, Xiao H. Clinically controlled study on phased integral needling method for treatment of cerebral infarction. <i>Chinese Acupuncture &amp; Moxibustion.</i> 2005;25(6):395-398.                                                      | Compared two types of acupuncture      |
| 243 | Li XY, Sun ZR. Clinically controlled study on phased needling method for treatment of cerebral infarction. <i>Journal of Clinical Acupuncture and Moxibustion.</i> 2006;22(9):10-11.                                                                                                     | Compared two types of acupuncture      |
| 244 | Li T, Tian G, Zhang L, et al. Combination of Operation with Acupuncture for Massive Cerebral Infarction. <i>CHINESE JOURNAL OF INTEGRATIVE MEDICINE ON CARDIO - / CEREBROVASCULAR DISEASE.</i> 2006;4(7):585-587.                                                                        | Not compared with sham control         |
| 245 | Zhou TB, Hu GW. Combining psychotherapy with medication in treatment of cerebral stroke. <i>Medical Journal of Chinese People's Health.</i> 2007;19(2):134-137.                                                                                                                          | Not related to efficacy of acupuncture |
| 246 | Eom JY, Won SH, Kwon KR, Lee HS. Comparative study of acupuncture, bee venom acupuncture and bee venom herbal acupuncture on the treatment of post-stroke hemiplegic shoulder pain. <i>Journal of Korean Institute of Herbal Acupuncture.</i> 2006;9(1):139-154.                         | Compared two types of acupuncture      |
| 247 | Zou X, Wang D. Comparative study of cerebral infarction treated with acupuncture at 6 acupoints of yang meridian and calan. <i>Chinese journal of modern developments in traditional medicine.</i> 1990;10(4):199-202, 195.                                                              | Not compared with sham control         |
| 248 | Wang LC, Wang ZY, Kang XZ, Jia LJ. [Comparative study on effects of different acupuncture manipulation methods at neiguan (PC 6) on hand spasm in the patient of stroke]. <i>Chinese Acupuncture and Moxibustion.</i> 2008;28(7):503-506.                                                | Compared two types of acupuncture      |
| 249 | Duan G, He J, Zeng Z, Tang Q, Sun S. Comparison of effects of acupuncture on cerebral infarction in different parts. <i>World journal of acupuncture-moxibustion.</i> 1998;8(2):3-7.                                                                                                     | Not compared with sham control         |
| 250 | Zhong CM, Rong G, He FZ, Jin HY. Comparison of head and body acuapunctures in the treatment of deglutition disorders in subacute period of stroke. <i>Chinese Journal of Clinical Rehabilitation.</i> 2003;7(19):2706-2707.                                                              | Compared two types of acupuncture      |
| 251 | Li H, Hou ZW, Bai YL, Gu SZ. Comparison of the Therapeutic Effects among Scalp-,Body-acupuncture and Scalp-plus Body-acupuncture in the Treatment of 230 Cases of Stroke. <i>Acupuncture Research.</i> 2006;31(3):169-172.                                                               | Compared two types of acupuncture      |
| 252 | Bao F, Wang DH, Zhang YX, Wang FQ, Sun H. Comparison of therapeutic effects between body acupuncture and scalp acupuncture combined with body acupuncture on atherosclerotic cerebral infarction at acute stage. <i>Chinese Acupuncture &amp; Moxibustion.</i> 2008;28(1):10-12.         | Compared two types of acupuncture      |
| 253 | Junhua Z, Menniti-Ippolito F, Xiumei G, et al. Complex traditional Chinese medicine for poststroke motor dysfunction: a systematic review. <i>Stroke; A Journal Of Cerebral Circulation.</i> 2009;40(8):2797-2804.                                                                       | Not clinical trial                     |
| 254 | Ou HN, Kang J. Comprehensive rehabilitation therapy of extremity motor function in patients with stroke. <i>Chinese Journal of Rehabilitation Medicine.</i> 1999;14(3):106-108.                                                                                                          | Not related to efficacy of acupuncture |
| 255 | Schaechter JD, Connell BD, Stason WB, et al. Correlated change in upper limb function and motor cortex activation after verum and sham acupuncture in patients with chronic stroke. <i>J Altern Complement Med.</i> 2007;13(5):527-532.                                                  | Included                               |
| 256 | Schockert T, Schnitker R, Borojerdi B. Cortical Activation by Yamamoto New Scalp Acupuncture (YNSA) in the Treatment of Stroke Patients - A Sham-controlled Study aided by Functional Magnetic Resonance Imaging (fMRI). <i>Komplementäre und integrative Medizin.</i> 2009;50(4):46-54. | Not randomized controlled trial        |
| 257 | Schockert T, Schnitker R, Borojerdi B. Cortical Activation by Yamamoto New Scalp Acupuncture (YNSA) in the Treatment of Stroke Patients. <i>Deutsche Zeitschrift für Akupunktur.</i> 2009;52(1):21-29.                                                                                   | Duplicated article                     |
| 258 | Liu H, Wang Y, Chang LH. Development of Neurobiochemical Researches on Acupuncture Treatment of Ischemic Stroke. <i>Acupuncture Research.</i> 2004;29(1):72-76.                                                                                                                          | Not clinical trial                     |
| 259 | Nam BH, Choi HS. Differences in electric potential of meridian system(2)-Comparing electrical potentials between healthy volunteers and patients with cerebral infarction-. <i>The Journal of Korean Acupuncture and Moxibustion Society.</i> 2000;17(3):25-35.                          | Not related to efficacy of acupuncture |
| 260 | Sze FK, Wong E, Yi X, Woo J. Does acupuncture have additional value to standard poststroke motor rehabilitation? <i>Stroke.</i> 2002;33(1):186-194.                                                                                                                                      | Not compared with sham control         |
| 261 | Hopwood V, Lewith GT. Does acupuncture help stroke patients become more independent?. <i>J Altern Complement Med.</i> 2005;11(1):175-177.                                                                                                                                                | Not clinical trial                     |
| 262 | Sze FK, Wong E, Or KK, Lau J, Woo J. Does acupuncture improve motor recovery after stroke? A meta-analysis of randomized controlled trials. <i>Stroke.</i> 2002;33(11):2604-2619.                                                                                                        | Not clinical trial                     |
| 263 | Song Y, Pei J, Liu ZD, et al. Dynamic changes in traditional Chinese medicine syndromes in patients with ischemic stroke treated by acupuncture. <i>Journal of Chinese Integrative Medicine.</i> 2009;7(4):334-341.                                                                      | Uncontrolled trial                     |

|     |                                                                                                                                                                                                                                                                                                                           |                                        |
|-----|---------------------------------------------------------------------------------------------------------------------------------------------------------------------------------------------------------------------------------------------------------------------------------------------------------------------------|----------------------------------------|
| 264 | Fu LX, Zhao JG, Zhao H, et al. Dynamic Observation on Effects of Acupuncture on Blood Endothelin and Nitric Oxide Levels in the Patient of Cerebro-Cardiac Apoplexy. <i>Chinese Acupuncture &amp; Moxibustion</i> . 2002;22(9):628-630.                                                                                   | Compared two types of acupuncture      |
| 265 | Chen RZ, Fang WB. Early intervention for impaired swallowing in patients with unilateral acute cerebral infarction. <i>Chinese Journal of Clinical Rehabilitation</i> . 2005;9(17):6-7.                                                                                                                                   | Not related to efficacy of acupuncture |
| 266 | Liu KJ. Early intervention of acupuncture for patients with severe stroke in intensive care unit. <i>Chinese Journal of Clinical Rehabilitation</i> . 2006;10(23):186-187.                                                                                                                                                | Not clinical trial                     |
| 267 | Guo YQ, Chen LY, Zhou LJ, Li H, Qu XM, Liu DS. Effect of "Phased Whole Acupuncture Therapy" on Ability of Daily Life in 63 Cases of Cerebral Infarction-induced Hemiplegia. <i>Journal of Traditional Chinese Medicine</i> . 2006;26(2):88-91.                                                                            | Compared two types of acupuncture      |
| 268 | Zhang DS, Lu YK, Su ZR, Cai DK. Effect of acupoint sticking of "Hua yutie" on VEGF expression in rats of focal cerebral ischemia. <i>Chinese Acupuncture and Moxibustion</i> . 2009;29(3):217-221.                                                                                                                        | Animal study                           |
| 269 | Chen J, Liang H, Ma Y, et al. Effect of acupoint treatment on plasma interleukin-6 and tumor necrosis factor- $\alpha$ levels in type 2 diabetic patients complicated with acute cerebral infarction. <i>Integrated Traditional Chinese and Western Medicine In Practice of Critical Care Medicine</i> . 2001;8(2):92-94. | Not compared with sham control         |
| 270 | Li P. Effect of acupuncture plus moxibustion of Yongquan point on dysphasia and blood rheology in stroke patients. <i>World journal of acupuncture-moxibustion</i> . 2001;11(2):13-15.                                                                                                                                    | Uncontrolled trial                     |
| 271 | Lu HX. Effect of acupuncture add point injection therapy on treatment of vascular dementia. <i>Chin J Cardiovasc Rehabil Med</i> . 2004;14(3):250-251.                                                                                                                                                                    | Not related to stroke                  |
| 272 | Gong B, Li C, Li L. Effect of acupuncture and massage combined with functional training on neurological function and activities of daily living of patients with cerebral infarction. <i>Chinese Journal of Clinical Rehabilitation</i> . 2006;10(11):1-4.                                                                | Uncontrolled trial                     |
| 273 | Li YF, Deng BY, Su SY, Zhou EH. Effect of Acupuncture and Moxibustion on Blood Lipid Level in Apoplectic Hemiplegia Patient with Omalgia. <i>Acupuncture Research</i> . 2004;29(4):289-292.                                                                                                                               | Complex therapy                        |
| 274 | Zhang NX, Huang TQ, Liu GZ. Effect of acupuncture and rehabilitation training on barthel index in early-stage of stroke cases. <i>Journal of acupuncture and tuina science</i> . 2009;7(3):143-146.                                                                                                                       | Not compared with sham control         |
| 275 | Lan CY. Effect of acupuncture at new piantan acupoint and yangming channel on motor dysfunction after cerebral infarction. <i>Chinese Journal of Clinical Rehabilitation</i> . 2004;8(4):682-683.                                                                                                                         | Not compared with sham control         |
| 276 | Zhang CH. Effect of acupuncture combined with function training on patients with acute stroke. <i>Chin J Rehabil Theory Practice</i> . 2005;11(11):947.                                                                                                                                                                   | Complex therapy                        |
| 277 | Cui X, Hu Y, Wu Y, et al. Effect of Acupuncture Combined with Functional Training on Activities of Daily Living of Patients with Cerebral Infarction. <i>Chinese Journal of Rehabilitation</i> . 2007;22(5):314-315.                                                                                                      | Not compared with sham control         |
| 278 | He XI, Tan JL, Huang YX, et al. Effect of acupuncture combined with training of the rehabilitation apparatus on upper limb motor function of patients with ischemic stroke. <i>Chin J Rehabil Theory Practice</i> . 2004;10(2):86-87.                                                                                     | Not related to efficacy of acupuncture |
| 279 | LI Yi, LI Yu-feng, PAN Fu-qiong, et al. Effect of Acupuncture Cooperating with Bobath Approach on Spasticity after Stroke. <i>Chinese Journal of Rehabilitation Theory and Practice</i> . 2008;14(11):1063-1064.                                                                                                          | Not compared with sham control         |
| 280 | Lu J, Wang W. Effect of acupuncture on blood flow of vertebral and basilar arteries in stroke patients. <i>World journal of acupuncture-moxibustion</i> . 2004;14(2):3-6.                                                                                                                                                 | Uncontrolled trial                     |
| 281 | Chen J. Effect of Acupuncture on Contents of Hypothalamic Corticotropin and Tryptophan-Releasing Hormones in the Patient of Diabetes Complicated with Acute Cerebral Infarction. <i>Chinese Acupuncture and Moxibustion</i> . 2001;21(6):363-365.                                                                         | Not compared with sham control         |
| 282 | Zhou S, Fang B, Sun G. EFFECT OF ACUPUNCTURE ON NEUROLOGICAL DEFECTS AND DAILY LIFE ABILITY IN PATIENTS WITH ACUTE CEREBRAL HEMORRHAGE. <i>World journal of acupuncture-moxibustion</i> . 2003;13(4):19-22.                                                                                                               | Not compared with sham control         |
| 283 | Chen J, Liang H, Guan S, Ma Y. EFFECT OF ACUPUNCTURE ON PLASMA STRESS HORMONE LEVELS OF HYPOTHALAMUS-PITUITARY-ADRENAL AXIS IN TYPE II DIABETES WITH CONCURRENT ACUTE CEREBRAL INFARCTION PATIENTS. <i>World journal of acupuncture-moxibustion</i> . 2001;11(1):9-12.                                                    | Not compared with sham control         |
| 284 | Wu XP, Zhou S, Liu YX, Wang YW, Zhou DF, Sun GJ. Effect of Acupuncture on Plasma $\beta$ -EP in Patients with Ischemic Stroke. <i>World journal of acupuncture-moxibustion</i> . 2000;10(2):45-47.                                                                                                                        | Not randomized controlled trial        |
| 285 | Huang YL, Liang FR, Chang HS, et al. Effect of acupuncture on quality of life in post-ischemic stroke patients with dysphagia. <i>Chinese journal of integrated traditional and Western medicine</i> . 2008;28(6):505-508.                                                                                                | Not compared with sham control         |
| 286 | Song HC, Bom HS, Kang HJ, Ahn SG, Kim SM, Jeong HJ, Kim JY. Effect of Acupuncture on Regional Cerebral Blood Flow at Acupoints GV 20, GV 26, LI 4, ST 36, SP 6 Evaluated by Tc-99m ECD Brain SPECT. <i>The Korean Journal of Nuclear Medicine</i> 2000;34(6):456-464.                                                     | Not randomized controlled trial        |
| 287 | Lan L, et al. Effect of Acupuncture on Somatosensory Evoked Potentials in Patients with Pontine Infarction. <i>Zhejiang Journal of Integrated Traditional Chinese and Western Medicine</i> . 2006;16(8):467-468.                                                                                                          | Not compared with sham control         |
| 288 | Zhou S, Fang B, Wang S, et al. Effect of Acupuncture on TNF- $\alpha$ , NSE and LPO of Patients with Acute Cerebral Hemorrhage. <i>Journal of Hubei College of TCM</i> . 2003;5(1):39-41.                                                                                                                                 | Not compared with sham control         |
| 289 | Lee SH, Kim EJ, Park YC, Koh YJ, Nam DW. Effect of acupuncture stimulation on heart rate variability in stroke patients. <i>The Journal of Korean Acupuncture and Moxibustion Society</i> . 2006;23(1):135-143.                                                                                                           | Uncontrolled trial                     |
| 290 | Zhao JG, Cao CH, Liu CZ. Effect of acupuncture treatment on spastic states of stroke patients. <i>Journal of the neurological sciences</i> . 2009;276(1/2):143-147.                                                                                                                                                       | Not randomized controlled trial        |

|     |                                                                                                                                                                                                                                                                                                              |                                        |
|-----|--------------------------------------------------------------------------------------------------------------------------------------------------------------------------------------------------------------------------------------------------------------------------------------------------------------|----------------------------------------|
| 291 | He X, Tan J, Wang B, et al. Effect of acupuncture using Xingnao Kaiqiao needling method on patients with post-stroke depression. <i>Chin J Rehabil Theory Practice</i> . 2005;11(6):467-468.                                                                                                                 | Not compared with sham control         |
| 292 | Zhou W, Liu H, Wang L. Effect of Alternative Administration of Scalp-acupuncture, Body-acupuncture and Abdominal-acupuncture on the Upper-limb Dyscinesia in Patients with Stroke. <i>Acupuncture research</i> . 2009;34(2):128-131.                                                                         | Compared two types of acupuncture      |
| 293 | Wang S, Ma L, Xu Y. Effect of Auricular Acupuncture Combined with Physical Therapy on Motor Function of Stroke Patients. <i>Chin J Rehabil Theory Practice</i> . 2006;12(5):412-413.                                                                                                                         | Not compared with sham control         |
| 294 | Zhou XW, Song ZH, Wang C, Du YF, Qi W. Effect of buyang huanwu tang differentiating syndromes in treating mental disorder after stroke. <i>Chinese Journal of Clinical Rehabilitation</i> . 2004;8(31):6974-6976.                                                                                            | Not related to efficacy of acupuncture |
| 295 | Chen LP, Jiao WG, Jia JJ, et al. Effect of comprehensive therapy on depression post stroke. <i>Chin J Rehabil Theory Practice</i> . 2006;12(1):33-34.                                                                                                                                                        | Complex therapy                        |
| 296 | Zhao YZ, Yu CD. [Effect of cranial needling combined with medicine on IL-6 in the patient of acute cerebral hemorrhage]. <i>Chinese Acupuncture and Moxibustion</i> . 2008;28(8):569-572.                                                                                                                    | Not compared with sham control         |
| 297 | Lun X, Rong L, Fu B. Effect of CT localization needling around the lesion area at skull on the concomitant symptoms and hemorheological changes in stroke patients during restoration period. <i>Chinese Journal of Clinical Rehabilitation</i> . 2006;10(3):140-142.                                        | Not related to efficacy of acupuncture |
| 298 | He YZ, Han B, Zheng SF, Wang LN, Chen ZM, Hu J, Li JM, Peng JX. Effect of Different Acupuncture Needle-retaining Time on Hemorheology in Ischemic Stroke Patients. <i>Acupuncture Research</i> . 2007;32(5):338-341.                                                                                         | Compared two types of acupuncture      |
| 299 | He YZ, Han B, Ln XH, Wang LN, Chen ZM, Hu J, Li JM, Peng JX. Effect of different needle-retaining time in acupuncture for ischemic stroke patient's cerebral blood flow velocity. <i>Journal of Jinan University</i> . 2006;27(2):262-266.                                                                   | Compared two types of acupuncture      |
| 300 | Zhou C, Feng S, Xu C. Effect of Du Meridian Electroacupuncture of the Scalp on Deglutition Disorder after Stroke. <i>Chin J Rehabil Theory Practice</i> . 2006;12(10):899-900.                                                                                                                               | Not compared with sham control         |
| 301 | Jiao WG, Zhu CX, Chen LP, et al. Effect of Early Multidisciplinary Rehabilitation on Motor Function of Old Stroke Patients. <i>Chinese Journal of Rehabilitation Theory and Practice</i> . 2007;13(12):1159-1160.                                                                                            | Not related to efficacy of acupuncture |
| 302 | Cian KL, Wang T. Effect of early rehabilitation therapy on short and long term functional assessment in hemiplegic patients after stroke. <i>Chinese Journal of Clinical Rehabilitation</i> . 2004;8(25):5210-5211.                                                                                          | Not related to efficacy of acupuncture |
| 303 | Lee HJ, Kim SY, Lee SH, Seo DM, Lee DI, Kim KS, Lee JD, Lee YH, Yang HI, Park JK, Choi DY. Effect of East-West pain treatment for central poststroke pain on alleviation of pain and rehabilitation. <i>The Journal of Korean Acupuncture and Moxibustion Society</i> . 2003;20(2):42-49.                    | Uncontrolled trial                     |
| 304 | Tang x, Wang F, tan H. Effect of edaravone and acupuncture treatment on the neurological function and the free radical in patients with acute cerebral infarction. <i>Practical Journal of Cardiac Cerebral Pneumal and Vascular Disease</i> . 2007;15(4):261-265.                                           | Not compared with sham control         |
| 305 | Gong WJ, Zhang T, Cui LH, et al. Effect of Electro-acupuncture at Zusanli (ST36) on Stroke Patients in Hemiplegic Spasm Period. <i>Chinese Journal of Rehabilitation Theory and Practice</i> . 2008;14(12):1165-1167.                                                                                        | Not compared with sham control         |
| 306 | Ryu HJ, Kim SS. Effect of Electroacupuncture by Different Insertion Method on Upper Limb Function in Post Stroke Patients with Hemiplegia. <i>Journal of Oriental Rehabilitation Medicine</i> . 2006;16(1):49-61.                                                                                            | Compared two types of acupuncture      |
| 307 | Kim WS, Kim IS, Kim SJ. Effect of electroacupuncture on motor recovery in a rat stroke model during the early recovery stage. <i>Brain research</i> . 2009;1248:176-183.                                                                                                                                     | Animal study                           |
| 308 | Xu J, Wang J, Zhou H. Effect of Eye Acupuncture on Patients with Post Stroke Depression. <i>Liaoning Journal of Traditional Chinese Medicine</i> . 2008;35(1):119-120.                                                                                                                                       | Not compared with sham control         |
| 309 | Zhou GH, Xie KL, Zhao Q, et al. Effect of facilitation techniques combined with acupuncture in patients with hemiplegia after stroke. <i>Chin J Rehabil Theory Practice</i> . 2003;9(3):148-149.                                                                                                             | Not related to efficacy of acupuncture |
| 310 | Han JA, Moon SK, Jeong DW, Bae HS, Park SU, Jung WS, Park JM, Ko CM, Cho KH, Kim YS, Kim DY. Effect of GB 34-GB 39 electro-acupuncture on regional cerebral blood flow in stroke patients and normal volunteers evaluated by SPECT and SPM. <i>Journal of Korean Oriental Medicine</i> . 2006;27(3):187-200. | Uncontrolled trial                     |
| 311 | Tang XJ, Chen HR, Tan H, Li XG. Effect of GM <sub>1</sub> and early acupuncture treatment on the neurological function in patients with acute cerebral infarction. <i>West China Journal of Pharmaceutical Sciences</i> . 2006;21(5):496-497.                                                                | Not related to efficacy of acupuncture |
| 312 | Tang Q, Wang D. Effect of head acupuncture combined with facilitation techniques on movement function after stroke. <i>Chin J Rehabil Theory Practice</i> . 2001;7(2):71-72.                                                                                                                                 | Not compared with sham control         |
| 313 | Wang Y, Lu x, Li J, et al. Effect of head acupuncture combined with rehabilitation techniques on movement function of upper limbs after stroke. <i>Chin J Rehabil Theory Practice</i> . 2002;8(7):440-441.                                                                                                   | Not compared with sham control         |
| 314 | Park YC, Ahn TW, Kim DH, Kim BT. Effect of He-Ne laser invascular irradiation in treatment of cerebral infarction. <i>The Journal Thesis of Institute of Korean medicine in Daejeon University</i> . 2000;9(1):387-397.                                                                                      | Not related to efficacy of acupuncture |
| 315 | Liu CS, Zhou H, Gao ZQ. Effect of Hyperbaric Oxygen Synthetic Treatment of 160 Cases of Cerebral Infarction. <i>Journal of Clinical Research</i> . 2006;23(7):1098-1100.                                                                                                                                     | Not related to efficacy of acupuncture |
| 316 | Gu L, Su L. Effect of integrated Chinese-western therapy on 105 patients with acute stroke. <i>Chinese Journal of Practical Diseases</i> . 2008;11(3):10-12.                                                                                                                                                 | Not compared with sham control         |

|     |                                                                                                                                                                                                                                                                                            |                                         |
|-----|--------------------------------------------------------------------------------------------------------------------------------------------------------------------------------------------------------------------------------------------------------------------------------------------|-----------------------------------------|
| 317 | Ge LT, Lin L, Zhang J, Hu XH. Effect of Levodopa and Benserazide Hydrochloride, mecobalamin in combination with acupuncture and functional training on motor dysfunction after acute cerebral infarction. <i>Chinese Journal of Clinical Rehabilitation</i> . 2005;9(1):128-130.           | Complex therapy                         |
| 318 | Ryu JM, Moon SK, Kim YS, Park SU, Jung WS, Ko CN, Cho KH, Bae HS, Kim DY. Effect of LI4-LI11 electro-acupuncture on regional cerebral blood flow in healthy human - evaluated by 99m Tc-ECD brain SPECT-. <i>Journal of Korean Oriental Medicine</i> . 2006;27(2):36-43.                   | Uncontrolled trial                      |
| 319 | Lei LM, Pang J, Huang JJ, Chen JX, Huang Y, He YF, Su HG, Wu G, Su CM, Gan YJ. Effect of massotherapy in reflex zone of feet on motor function and hemorrheological indexes of hemiplegic stroke patients. <i>Chinese Journal of Clinical Rehabilitation</i> . 2006;10(11):11-13.          | Not related to efficacy of acupuncture  |
| 320 | Li YH, Li M. Effect of motion and scalp acupuncture on myodynamia of hemiparalytic patients in stroke. <i>Chinese Journal of Clinical Rehabilitation</i> . 2002;6(19):2969.                                                                                                                | Uncontrolled trial                      |
| 321 | Jiang GH, Li YH, Huang Y, Li JP. Effect of MRI-guided Surrounding Needling on Hemorheology of Stroke Patients. <i>Acupuncture Research</i> . 2004;29(1):63-68.                                                                                                                             | Compared two types of acupuncture       |
| 322 | Li B, Bai J. Effect of Nucha Electrical Acupuncture Earlier Intervention on Depression Incident after Acute Cerebral Infarction. <i>Chin J Rehabil Theory Practice</i> . 2007;13(11):1061-1062.                                                                                            | Not compared with sham control          |
| 323 | Guan ZH, Yi R, Ye J, Ding LL, Zhu XY, Guo CP. Effect of opening point method of ziwu liuzhu on myocardial ischemia in the patient of stroke. <i>Chinese Acupuncture &amp; Moxibustion</i> . 2005;25(11):823-824.                                                                           | Compared two types of acupuncture       |
| 324 | Kang SK, Kim YS. Effect of oriental medicine on the recovery from acute stroke. <i>The Journal Thesis of Institute of East-West Medicine</i> . 1996;1:251-259.                                                                                                                             | Not compared to efficacy of acupuncture |
| 325 | Lee JH, Lee HM, Cheong BS, Yun HS, Cho SG, Lee SH, Jun HJ, Nam SS, Kim YS. Effect of Paekoe(GV20) acupuncture on cerebral blood flow. <i>The Journal of Korean Acupuncture and Moxibustion Society</i> . 2001;18(6):105-113.                                                               | Uncontrolled trial                      |
| 326 | Li L, Gong JQ, Ding GH. Effect of parallel scalp acupuncture therapy on hemodynamic function of cerebral circulation in post-stroke patients. <i>Journal of acupuncture and tuina science</i> . 2008;6(5):309-311.                                                                         | Uncontrolled trial                      |
| 327 | Guo YQ, Chen LY, Zhou LJ, et al. Effect of Phased Whole Acupuncture on Ability of Daily Life in 63 Cases of Hemiplegia due to Cerebral Infarction. <i>Journal of Traditional Chinese Medicine</i> . 2005;46(6):425-426.                                                                    | Compared two types of acupuncture       |
| 328 | Wang WJ, Li KJ, Zhou X, Liu S, Tan T, Han SC. Effect of promote resuscitation acupuncture combined with penetration needling from Pihui to Yungch'uan on motor function after stroke. <i>Chinese Journal of Clinical Rehabilitation</i> . 2003;7(25):3482-3483.                            | Compared two types of acupuncture       |
| 329 | Zhu BL, Wang Z, Ye TS, et al. Effect of Resuscitating Acupuncture and Scalp Acupuncture on Neurological Function and High Sensitivity C Reactive Protein in Patients with Acute Cerebral Infarction. <i>Chinese Journal of Rehabilitation Theory and Practice</i> . 2008;14(11):1059-1061. | Not compared with sham control          |
| 330 | Zhang LT, Feng WL, Zhang HW, et al. Effect of Reverse Acupuncture by Stages Combined with Facilitation Techniques on Motor Function of Stroke Patients. <i>Chin J Rehabil Theory Practice</i> . 2007;13(2):137-138.                                                                        | Compared two types of acupuncture       |
| 331 | Shi HF, Zheng XH. Effect of Scalp Acupuncture Drawing Method on Motor Function in Hemiplegic Patients following Cerebral Thrombosis at Convalescent Period. <i>Chinese journal of integrated traditional and Western medicine</i> . 2007;27(4):361-363.                                    | Compared two types of acupuncture       |
| 332 | Xie D, Zhu L, Liu H, et al. Effect of Scalp Acupuncture on Cognitive and Motor Functions of Stroke Patients in Recovery Stage. <i>Chin J Rehabil Theory Practice</i> . 2007;13(6):542-543.                                                                                                 | Not compared with sham control          |
| 333 | Huang Y, Chen J, Zou J. Effect of scalp electro-acupuncture on post-stroke depression. <i>Chinese Journal of Rehabilitation</i> . 2005;9(40):172-173.                                                                                                                                      | Compared two types of acupuncture       |
| 334 | Bao C, Zhang L, Dong G. Effect of scalp penetration acupuncture on plasma level of ET <sub>(-1)</sub> and NSE in patients with acute intracerebral hemorrhage. <i>Journal of Clinical Acupuncture and Moxibustion</i> . 2005;21(9):21-23.                                                  | Not compared with sham control          |
| 335 | Zeng QL, Wu XP, He XB, Pan FM. Effect of Scalp-acupuncture Combined with Qingkailing Injection on Brain Tissue Endothelin and Calcitonin in Acute Intracerebral Hemorrhage Rats. <i>Lishizhen Medicine and Materia Medica Research</i> . 2008;19(12):2936-2937.                            | Animal study                            |
| 336 | Zhang HX, Zhang TF. Effect of Scalp-acupuncture on Plasma ET Content of Apoplectic Patients. <i>Acupuncture Research</i> . 2002;27(3):228-229.                                                                                                                                             | Not randomized controlled trial         |
| 337 | Lee SH, Shin KH, Kim JU. Effect of seven points of CVA acupuncture on cerebral blood flow. <i>The Journal of Korean Acupuncture and Moxibustion Society</i> . 2004; 21(3):83-97.                                                                                                           | Uncontrolled trial                      |
| 338 | Ding ZL, Gao L, Gu SZ. Effect of the Combination of Acupuncture and Chinese Medicine in Treating Aphasia in Patients of Acute Ischemic Stroke. <i>Chinese Journal of Information on TCM</i> . 2007;14(5):12-14.                                                                            | Complex therapy                         |
| 339 | Li LZ. Effect of zhongfeng erdai huichun capsule combined with rehabilitation training on extremity spasticity of stroke. <i>Chinese Journal of Clinical Rehabilitation</i> . 2004;8(25):5320-5321.                                                                                        | Complex therapy                         |
| 340 | Ryu SH. Effects of Electroacupuncture Stimulation on the Hemiplegic Upper Extremity after Stroke. <i>Kyunghee Univ</i> . 2001.                                                                                                                                                             | Complex therapy                         |
| 341 | Ding Y, LV Q, Yan Y, et al. Effectiveness of Acupuncture and Rehabilitation Training in the Treatment of Dysphagia Caused by Stroke. <i>Chinese Journal of Rehabilitation</i> . 2007;22(2):90-91.                                                                                          | Not compared with sham control          |
| 342 | Park J, Hopwood V, White AR, Ernst E. Effectiveness of acupuncture for stroke: a systematic review. <i>J Neurol</i> . 2001;248(7):558-63.                                                                                                                                                  | Not clinical trial                      |

|     |                                                                                                                                                                                                                                                                                                      |                                        |
|-----|------------------------------------------------------------------------------------------------------------------------------------------------------------------------------------------------------------------------------------------------------------------------------------------------------|----------------------------------------|
| 343 | Ko CN, Min IK, Park SW, Jung WS, Moon SK, Park JM, Cho KH, Kim YS, Bae HS. Effectiveness of Bee Venom Acupuncture on Shoulder Pain after Stroke. <i>Journal of Korean Oriental Medicine</i> . 2007;28(1):11-24.                                                                                      | Pharmacopuncture                       |
| 344 | Shin BC, Lim HJ, Lee MS. Effectiveness of combined acupuncture therapy and conventional treatment on shoulder range of motion and motor power in stroke patients with hemiplegic shoulder subluxation: a pilot study. <i>International Journal of Neuroscience</i> . 2007;111:519-523.               | Uncontrolled trial                     |
| 345 | Kang SK, Kim YS. Effectiveness of electroacupuncture on spasticity in stroke patients. <i>Journal of Oriental Medicine</i> . 1997;2(1):25-32.                                                                                                                                                        | Uncontrolled trial                     |
| 346 | Zhong C, Liu Q, jin H, Liu H. Effects of acupuncture and balance facilitation of muscular tension on the early rehabilitation of patients with stroke and hemiplegia. <i>Chinese Journal of Clinical Rehabilitation</i> . 2002;6(23):3612-3613.                                                      | Not compared with sham control         |
| 347 | Chen LD, Guo XL, Tao J, et al. Effects of acupuncture and muscle strength training on walking function in patients for hemiplegia post stroke. <i>Chinese Journal of Rehabilitation Medicine</i> . 2006;21(2):136-139.                                                                               | Complex therapy                        |
| 348 | Chen KJ, Liu SF, Li JR, et al. Effects of Acupuncture and Traditional Chinese Medicine on the Extremity Function of Patients with Cerebral Hemorrhage. <i>Chinese Journal of Rehabilitation</i> . 2006;21(3):166-167.                                                                                | Complex therapy                        |
| 349 | Qian YF, Fan XN, Li YJ, et al. Effects of acupuncture at different acupoints on cerebral blood flow in cerebral ischemia model rats. <i>Chinese Acupuncture and Moxibustion</i> . 2009;29(3):213-216.                                                                                                | Animal study                           |
| 350 | Guo A, Li A, Gu Y, Jin H. Effects of acupuncture combined with medicine on hypothalamic pituitary adrenal axis in post stroke depression patients. <i>Med J of Communications</i> . 2007;21(5):496-498.                                                                                              | Not compared with sham control         |
| 351 | Jin JJ, Xu YL. Effects of acupuncture combined with modern rehabilitation technique at early stage on life self-care ability and mental state of the patient of stroke. <i>Chinese Acupuncture &amp; Moxibustion</i> . 2005;25(5):304-306.                                                           | Not related to efficacy of acupuncture |
| 352 | Liu JX, Wang J, Xu JL. Effects of Acupuncture Combined with Proprioceptive Neuromuscular Facilitation Techniques on Rehabilitation of Upper Limb and Daily Live Ability in Stroke Patients with Hemiplegia. <i>Applied Journal of General Practice</i> . 2007;5(7):620-621.                          | Complex therapy                        |
| 353 | Yun JM, Lee MG, Lee SW, Kang BG, Kim TJ, Shin YI, Lee I, Moon BS. Effects of acupuncture on dysphagia of stroke patients. <i>Korean Journal of Oriental Physiology and pathology</i> . 2008;22(1):199-203.                                                                                           | Uncontrolled trial                     |
| 354 | Wang X, Yang D, Xu K, Zhang G, Lin C, Zhao X. Effects of acupuncture on evoked potential, concentration of serum neuron-specific enolase and myelin basic protein in patients with cerebral infarction. <i>Chin J Phys Med Rehabil</i> . 2004;26(1):30-32.                                           | Not compared with sham control         |
| 355 | Li T, Tian GJ, Yu JC, Wei GW, Sun J, Zhang L, Du YH, Han JX. Effects of acupuncture on nervous function in the patient of extensive cerebral infarction after operation. <i>Chinese Acupuncture &amp; Moxibustion</i> . 2008;28(12):869-872.                                                         | Not compared with sham control         |
| 356 | Wu XL, Li XD, Liu AG, Li YQ, An ZH. Effects of acupuncture on rehabilitation of nervous functions in the stroke patient of different OCSF types. <i>Chinese Acupuncture &amp; Moxibustion</i> . 2008;28(5):328-330.                                                                                  | Compared two types of acupuncture      |
| 357 | He Y, Wang L, Huang L, Wang X, Liu S, Fu Y, Han B, Li J, Hu J. Effects of acupuncture on the cortical functional areas activated by index finger motion in the patient with ischemic stroke. <i>Chinese Acupuncture and Moxibustion</i> . 2006;26(5):357-361.                                        | Uncontrolled trial                     |
| 358 | Lee SS, An GP, Eom HJ, Nam Y, Kim DW. Effects of Acupuncture therapy on Cerebral Blood flow in Migraineurs. <i>The Journal of Korean Acupuncture and Moxibustion Society</i> . 2001;18(6):135-140.                                                                                                   | Not related to stroke                  |
| 359 | Zhang G, Ning L, Gao S. Effects of acupuncture therapy on plasma neuropeptide Y levels and resuscitation in patients with very early stage acute cerebral infarction: A randomized controlled study. <i>Neural Regeneration Research</i> . 2009;4(2):157-160.                                        | Not compared with sham control         |
| 360 | Gosman-Hedstrom G, Claesson L, Klingenstierna U, et al. Effects of acupuncture treatment on daily life activities and quality of life: a controlled, prospective, and randomized study of acute stroke patients. <i>Stroke</i> . 1998;29(10):2100-2108.                                              | Included                               |
| 361 | Alexander DN, Cen S, Sullivan KJ, Bhavnani G, Ma X, Azen SP; ASAP study group. Effects of acupuncture treatment on poststroke motor recovery and physical function. <i>Neurorehabil Neural Repair</i> . 2004;18(4):259-267.                                                                          | Not compared with sham control         |
| 362 | Cho TS, Son IS, Kim CH, Seo JC, Youn HM, Jang KJ, Song CH, Ahn CB. Effects of added Tong's acupuncture on NIH stroke scale and MBI in stroke patients. <i>The Journal of Korean Acupuncture and Moxibustion Society</i> . 2002;20(5):35-45.                                                          | Compared two types of acupuncture      |
| 363 | Ahn CH, Bae HS, Roh JH, Moon SK, Ko CN, Joh KH, Kim YS, Lee KS. Effects of auricular acupuncture on the mild hypertension. <i>Journal of Korean Oriental Medicine</i> . 2000;20(4):93-97.                                                                                                            | Uncontrolled trial                     |
| 364 | Seo JC, Cheong BS, Yun HS, Cho SG, Kim YM, Kim JI, Lee YH. Effects of contralateral acupuncture on recovery of motor disorders in stroke patients. <i>The Journal of Korean Acupuncture and Moxibustion Society</i> . 2001;18(3):1-9.                                                                | Compared two types of acupuncture      |
| 365 | Seo JC, Baek YH, Nam TH, Seo DM, Lee HJ, Ha JY, Woo HS, Lee JD. Effects of contralateral both side acupuncture on NIH scale in stroke patients. <i>Journal of Korean Oriental Medicine</i> . 2001;22(3):98-104.                                                                                      | Compared two types of acupuncture      |
| 366 | Huang DE, Wu Q, Lin ZR, Lin D, Shen FF, Liu JZ. Effects of different interference orders of acupuncture and exercise therapy on the amplitude of somatosensory evoked potential (SEP) in the patient of hemiplegia after stroke. <i>Chinese Acupuncture &amp; Moxibustion</i> . 2006;26(12):869-872. | Compared two types of acupuncture      |
| 367 | Shen FF, Wu Q, Lin ZR, et al. Effects of different interference orders of electroacupuncture and exercise therapy on the therapeutic effect of hemiplegia after stroke. <i>Chinese Acupuncture and Moxibustion</i> . 2008;28(10):711-713.                                                            | Complex therapy                        |
| 368 | Xie XL, Zhang CX, Sun Y. Effects of early rehabilitation on neurological deficit and ADL in recoverable patients with stroke. <i>Medical Journal of Chinese People Health</i> . 2003;15(11):650-652.                                                                                                 | Not related to efficacy of acupuncture |

|     |                                                                                                                                                                                                                                                                                                                 |                                        |
|-----|-----------------------------------------------------------------------------------------------------------------------------------------------------------------------------------------------------------------------------------------------------------------------------------------------------------------|----------------------------------------|
| 369 | Pan CH, He JQ, Pu SX, Wan XL, Gao C. Effects of early rehabilitation therapy on the motor function of limbs and ability of daily living in patients with hemiplegia after stroke. <i>Chinese Journal of Clinical Rehabilitation</i> . 2004;8(13):2404-2405.                                                     | Not related to efficacy of acupuncture |
| 370 | Wu Y. Effects of electroacupuncture at the nerve trunk for treatment of apoplectic hemiplegia at the spastic stage. <i>J Tradit Chin Med</i> . 2008;28(3):183-185.                                                                                                                                              | Compared two types of acupuncture      |
| 371 | Si QM, Wu GC, Cao XD. Effects of electroacupuncture on acute cerebral infarction. <i>Acupunct Electrother Res</i> . 1998;23(2):117-124.                                                                                                                                                                         | Not compared with sham control         |
| 372 | Jingxi M, Yong L. Effects of electroacupuncture on expressions of angiogenesis factor and anti-angiogenesis factors in brain of experimental cerebral ischemic rats after reperfusion. <i>Journal of Traditional Chinese Medicine</i> . 2008;28(3):217.                                                         | Animal study                           |
| 373 | Zhang X, Yuan Y. EFFECTS OF ELECTRO-ACUPUNCTURE ON SOMATOSTATIN AND PANCREATIC POLYPEPTIDE IN ISCHEMIC CEREBROVASCULAR DISEASES. <i>Journal of Traditional Chinese Medicine</i> . 1999;19(1):54-58.                                                                                                             | Not compared with sham control         |
| 374 | Ryu SH, Lee KS, Kim TK, Choi YS, Yun SP, Jang JC, Moon SK, Ko CN, Cho KH, Kim YS, Bae HS. Effects of electroacupuncture on the hemiplegic upper extremity after stroke. <i>Journal of Korean Oriental Medicine</i> . 2002;23(2):180-189.                                                                        | Not compared with sham control         |
| 375 | Chou PC, Chu HY, Lin JG. Effects of Electroacupuncture Treatment on Impaired Cognition and Quality of Life in Taiwanese Stroke Patients. <i>The Journal of Alternative and Complementary Medicine</i> . 2009;15(10):1-7.                                                                                        | Not compared with sham control         |
| 376 | Han ZX, Liu YG, Wei JL. [Effects of heavenly stem-prescription of point selection of needling methods of Ziwu Liuzhu on ischemic cerebrovascular diseases]. <i>Chinese Acupuncture and Moxibustion</i> . 2008;28(12):865-868.                                                                                   | Compared two types of acupuncture      |
| 377 | Yin CS, Nam SS, Kim YS, Lee JD, Kim CH, Koh HK. Effects of honeybee venom acupuncture therapy on the poststroke hemiplegic shoulder pain. <i>Journal of Korean Institute of Herbal Acupuncture</i> . 2000;3(2):213-232.                                                                                         | Pharmacopuncture                       |
| 378 | Lee HM, Jun HJ, Hwang JU, Nam SS, Kim YS. Effects of moving cupping therapy on the edematous hands of three patients with flaccid hemiplegia. <i>The Journal of Korean Acupuncture and Moxibustion Society</i> . 2002;19(2):231-237.                                                                            | Not related to efficacy of acupuncture |
| 379 | Han SS, Her JJ, Kim YJ. Effects of muscle strengthening exercises using a thera band on lower limb function of hemiplegic stroke patients. <i>J Korean Acad Nurs</i> . 2007;37(6):844-854.                                                                                                                      | Not related to efficacy of acupuncture |
| 380 | Wang JH, Li QY, Lai FL. Effects of reinforced trunk training on the motor function of hemiplegic patients caused by stroke. <i>Chinese Journal of Physical Medicine and Rehabilitation</i> . 2004;26(9):540-542.                                                                                                | Not related to efficacy of acupuncture |
| 381 | Yu ZS, Sai XB, Tang Q, Tong X, Yu H, Xu Q, et al. Effects of scalp acupuncture on acute cerebral infarction. <i>Shanghai Journal of Acupuncture and Moxibustion</i> . 1993;12(2):52-53.                                                                                                                         | Not compared with sham control         |
| 382 | Li YJ, Zhang HX, Zhang TF. Effects of scalp acupuncture on contents of homocysteine, fibrinogen and antithrombin • related to relapse of ischemic stroke. <i>Chinese Journal of Clinical Rehabilitation</i> . 2006;10(23):1-3.                                                                                  | Compared two types of acupuncture      |
| 383 | Ryu JC, Park IB, Kim SW, Kim CH, Seo JC, Youn HM, Jang KJ, Song CH, Ahn CB. Effects of scalp acupuncture on short-term NIHSS and MBI in stroke patients. <i>Academy Research of Dong-eui Korean Medical University</i> . 2002;6:7-18.                                                                           | Compared two types of acupuncture      |
| 384 | Wu X, Han X, Wang Y, Liu Y. Effects of Scalp-point Penetration Needling on Cerebral $\beta$ -EP and cAMP Contents and the Correlation between $\beta$ -EP and cAMP in Rats with Acute Cerebral Infarction. <i>Acupuncture Research</i> . 2002;27:170-173.                                                       | Animal study                           |
| 385 | Wang XY. Effects of the improved acupoints and rehabilitation exercise on locomotor ability of the upper limbs and ability of daily life in the patient of cerebral infarction. <i>Chinese Acupuncture &amp; Moxibustion</i> . 2007;27(3):179-181.                                                              | Complex therapy                        |
| 386 | Kong YQ, Xu F, Lin XR, Feng ZG, Shi HF, Yu GQ, Hu LR, Li XW, Jiang LZ. Effects of the Lifting Manipulation of Scalp Acupuncture for Raising Myodynamia of the Affected Limbs in Hemiplegic Patients Due to Cerebral Thrombosis. <i>Journal of Traditional Chinese Medicine</i> . 2005;25(4):256-259.            | Compared two types of acupuncture      |
| 387 | Ji J, Liu HL, Cheng JL, et al. Effects of 'Three Ways' Method of Acupuncture on Serum Levels of Tumor Necrosis Factor- $\alpha$ and Interleukin-1 $\beta$ in Patients with Acute Ischemic Cerebrovascular Diseases. <i>Chinese journal of integrated traditional and Western medicine</i> . 2006;26(6):500-503. | Compared two types of acupuncture      |
| 388 | Shin JC, Ryu CR, Cho MR. Effects of Xingjian(LR2) Shaofu(HT8) by reinforcing and reducing on the regional cerebral blood flow and mean arterial blood pressure in normal rats. <i>The Journal of Korean Acupuncture and Moxibustion Society</i> . 2003;20(6):190-200.                                           | Animal study                           |
| 389 | Lin LY, Wang QL. Efficacy observation of the TCM complex treatment for acute cerebral infarction. <i>Hebei Journal of Traditional Chinese Medicine</i> . 2005;27(6):410-412.                                                                                                                                    | Complex therapy                        |
| 390 | Zhang Z. Efficacy of acupuncture in the treatment of post stroke aphasia. <i>Journal of Traditional Chinese Medicine</i> . 1989;9(2):87-89.                                                                                                                                                                     | Not compared with sham control         |
| 391 | Liu SD, Jiang CM, Li DH, Xie CP, Yan JX. Efficiency and safety evaluation of Baimai ointment for alleviating hypermyotonia following cerebral infarction. <i>Neural Regen Res</i> . 2007;2(10):607-610.                                                                                                         | Not related to efficacy of acupuncture |
| 392 | Tian HF. Electro-acupuncture and Functional Training Treating Stroke-induced Hemiplegia. <i>Chinese Journal of Rehabilitation</i> . 2007;22(3):165-166.                                                                                                                                                         | Not related to efficacy of acupuncture |
| 393 | Liu W, Mukherjee M, Sun C, Liu H, , McPeak LK. Electroacupuncture may help motor recovery in chronic stroke survivors; a pilot study. <i>Journal of Rehabilitation Research and development</i> . 2008;45(4):587-596.                                                                                           | Not compared with sham control         |

|     |                                                                                                                                                                                                                                                                                    |                                        |
|-----|------------------------------------------------------------------------------------------------------------------------------------------------------------------------------------------------------------------------------------------------------------------------------------|----------------------------------------|
| 394 | Pomeroy VM, King L, Pollock A, Baily-Hallam A, Langhorne P. Electrostimulation for promoting recovery of movement or functional ability after stroke. <i>Cochrane Database Syst Rev.</i> 2006;(2):CD003241.                                                                        | Not clinical trial                     |
| 395 | Hopwood V, Lewth G, Prescott P, Campbell MJ. Evaluating the efficacy of acupuncture in defined aspects of stroke recovery: a randomised, placebo controlled single blind study. <i>J Neurol.</i> 2008;255(6):858-866.                                                              | Included                               |
| 396 | Huang YL, Liang FR, Wu X. Evaluation and analysis on the methodology of clinical trials of acupuncture treatment of dysphagia due to ischemic stroke. <i>Acupuncture Research.</i> 2007;32(1):68-70.                                                                               | Not clinical trial                     |
| 397 | Ye WS. Evaluation of acupuncture in the treatment of post stroke hemiplegia. <i>Chinese Journal of Clinical Rehabilitation.</i> 2003;7(28):3880.                                                                                                                                   | Not clinical trial                     |
| 398 | Dong XL, Feng XM, Zhu H. Evaluation of the effects of acupuncture for the treatment of hemiplegia in patients with stroke by Fugl-Meyer. <i>Chinese Journal of Clinical Rehabilitation.</i> 2003;7(19):2711-2712.                                                                  | Not randomized controlled trial        |
| 399 | Yue ZH. Evaluation of therapeutic effect of muscle region needling for post-stroke spasticity a randomized controlled trial. <i>Chinese Journal of Clinical Rehabilitation.</i> 2005;9(9):240-241.                                                                                 | Compared two types of acupuncture      |
| 400 | Park EJ, Cho MR. Experimental study of Dadun(LR1) shaochung(HT9) Shaofu(HT8) reinforcement in acupuncture on the improvement of cerebral hemodynamics. <i>The Journal of Korean Acupuncture and Moxibustion Society.</i> 2007;24(1):111-125.                                       | Animal study                           |
| 401 | Shin DH, Cho MR. Experimental study of Dadun(LR1) Shaofu(HT8) reduction in acupuncture on the improvement of cerebral hemodynamics. <i>The Journal of Korean Acupuncture and Moxibustion Society.</i> 2004;21(1):33-50.                                                            | Animal study                           |
| 402 | Dong GR, Wang Z, Wu BZ, Zhang H, Zhang CY, Yang Y. Exploration of Mechanism of the Immediate Effect on Acute Cerebral Hemorrhage of Needling Points on the Head; Effect of Acupuncture on Somatosensory. <i>International Journal of Clinical Acupuncture.</i> 2002;13(3):157-164. | Not randomized controlled trial        |
| 403 | Shi X, Zuo F, Guan L. Exploring the mechanism of acupuncture in the treatment of stroke from changes of glucose metabolism in the cerebral motor center. <i>World Journal of Acupuncture-Moxibustion.</i> 2004;14(3):9-12.                                                         | Uncontrolled trial                     |
| 404 | Chen Y, Mao M, Chen X, et al. Eye Acupuncture Combined with Exercise Therapy for the Treatment of Limb Dyskinesia due to Cerebral Infarction; A Report of 40 Cases. <i>Journal of New Chinese Medicine.</i> 2007;39(11):25-26.                                                     | Not compared with sham control         |
| 405 | Chen JJ, Xing Y. Facilitation techniques with stick ing of needle treatment of limb dyskinesia in 40 case of stroke. <i>Chinese Journal of Clinical Rehabilitation.</i> 2002;6(17):2654-2655.                                                                                      | Compared two types of acupuncture      |
| 406 | Li JM. Forty-five Cases of Apoplexy Treated by Electroacupuncture at the Points of Yin Meridians. <i>Journal of Traditional Chinese Medicine.</i> 2001;21(1): 20-22.                                                                                                               | Compared two types of acupuncture      |
| 407 | Guo ZL. Forty-six Cases of Acute Cerebral Infarction Treated with the Combined Use of Acupuncture and Drugs. <i>Journal of Traditional Chinese Medicine.</i> 2007;27(4):243-247.                                                                                                   | Complex therapy                        |
| 408 | Xu ZQ, Zhou BR, Liang YL, et al. Functional prognosis of early comprehensive rehabilitation applied to the patients with acute stroke. <i>Chinese Journal of Rehabilitation Medicine.</i> 2002;17(4):223-225.                                                                      | Not related to efficacy of acupuncture |
| 409 | Kim SB. Herbal acupuncture treatment for stroke patients. <i>Journal of Korean Institute of Herbal Acupuncture.</i> 1997;1(1):126-137.                                                                                                                                             | Pharmacopuncture                       |
| 410 | Moffet HH. How might acupuncture work? A systematic review of physiologic rationales from clinical trials. <i>BMC Complement Altern Med.</i> 2006;6:25.                                                                                                                            | Not clinical trial                     |
| 411 | Guo DL, Liu YJ, Qin YM, et al. Huangqi-xuesaitong Carotid-injection and Acupuncture of Ganglion Stellatum in Treating Cerebral Infarction. <i>Chinese Journal of Rehabilitation.</i> 2006;21(4):247-248.                                                                           | Complex therapy                        |
| 412 | Chi RH, Cai SM, Lin HP. Improving limb dysfunction of patients after stroke with acupuncture treatment instructed by standard staging. <i>Chinese Journal of Clinical Rehabilitation.</i> 2003;7(10):1544-1545.                                                                    | Compared two types of acupuncture      |
| 413 | Liu SK, Zhao XM, Xi ZM. Incidence rate and acupuncture-moxibustion treatment of post-stroke depression. <i>Chinese Acupuncture &amp; Moxibustion.</i> 2006;26(7):472-474.                                                                                                          | Complex therapy                        |
| 414 | Lin MX, Zhu SH, Shen QW, et al. Influence Analysis on the Hemodynamics to the Treatment of Cerebral Infarction with Acupuncture Therapy and Medicine at an Early Stage. <i>The Journal of Practical Medicine.</i> 2005;112(3A):671-673.                                            | Not compared with sham control         |
| 415 | Li Li, Ge Quanwu. Influence of acupuncture added early rehabilitation training on activities of daily living of hemiplegia patients after stroke. <i>Modern Journal of Integrated Traditional Chinese and Western Medicine.</i> 2009;18(6):604-607.                                | Not compared with sham control         |
| 416 | Yuan LS, Zhu ZC, Yu MZ. Influence of Acupuncture and Herbal Drugs on HDL and LDL in Patients with Cerebral Infarction in Different Positions. <i>ACTA UNIVERSITATIS TRADITIONISMEDICALIS SINENSIS PHARMACOLOGIAEQUE SHANGHAI.</i> 2001;15(2):28-30.                                | Not compared with sham control         |
| 417 | Zhao LJ, Guo JH, Cai H. Influence of Acupuncture and Moxibustion on Cerebral Microcirculation and Hemorheology in Stroke Patients. <i>Acupuncture Research.</i> 2003;28(4):299-302.                                                                                                | Not clinical trial                     |
| 418 | Li J, Zuo C, Guan Y et al. Influence of Acupuncture on Cerebral Glucose Metabolism in Patients with Cerebral Infarction. <i>Chinese Journal of Integrated Traditional and Western Medicine.</i> 2002; 22(10):741-744.                                                              | Uncontrolled trial                     |
| 419 | Chen M, Gu HW, Ma WP, Li QS, Yu Q, Liu XQ, Liu SH, Li WH, Liu HL, Dai MT. Influence of acupuncture on cerebral vasomotoricity of ischemic stroke. <i>Journal of acupuncture and Tuina Science.</i> 2007;5(1):32-34.                                                                | Not compared with sham control         |



|     |                                                                                                                                                                                                                                                                                                                                                                          |                                        |
|-----|--------------------------------------------------------------------------------------------------------------------------------------------------------------------------------------------------------------------------------------------------------------------------------------------------------------------------------------------------------------------------|----------------------------------------|
| 420 | Li Y. Influence of Acupuncture on Plasma NO and NOS Contents After Acute Cerebral Infarction. <i>Shanghai Journal of Acupuncture and Moxibustion</i> . 2006;25(4):16-17.                                                                                                                                                                                                 | Not compared with sham control         |
| 421 | Yuan Q, Yi W. Influence of Acupuncture on SOD and MDA in Patients with Cerebral Infarction. <i>Acupuncture Research</i> . 2000;25(3):217-219.                                                                                                                                                                                                                            | Not randomized controlled trial        |
| 422 | Li C, Yang H, Zhang Y, Chen J. Influence of Acupuncture on the Plasma Endotheliolysin in Acute Cerebral Infarction Victims. <i>Acupuncture Research</i> . 2000;25(3):214-216.                                                                                                                                                                                            | Not compared with sham control         |
| 423 | Qian XP, Xu F, Song JL, Zhao JH. Influence of different frequencies of acupuncture on therapeutic effect in patients with cerebral infarction at convalescence. <i>Chinese Acupuncture &amp; Moxibustion</i> . 2009;29(1):7-9.                                                                                                                                           | Compared two types of acupuncture      |
| 424 | He YZ, Han B, Hu J, Yuan L, Chen ZM, Li JM, Peng JX, Wang LN. INFLUENCE OF DIFFERENT NEEDLE-RETAINING TIME ON THE THERAPEUTIC EFFECT OF ACUPUNCTURE IN THE TREATMENT OF ISCHEMIC STROKE. <i>World Journal of Acupuncture-Moxibustion</i> . 2006;16(1):3-9.                                                                                                               | Compared two types of acupuncture      |
| 425 | Wang B, Li H, Xu B, Shi HP, Cao Y, Xu Y. Influence of earlier rehabilitative interventions on the emotions and the ability of daily living of patients following the first onset of acute stroke. <i>Chinese Journal of Clinical Rehabilitation</i> . 2005;9(29):176-178.                                                                                                | Not related to efficacy of acupuncture |
| 426 | Zhou HF, Wang EL, Xu JP, Cao TJ. Influence of Nape Cluster Acupuncture on Peripheral Serum ET Content in Patients with Acute Cerebral Infarction. <i>Shanghai Journal of Acupuncture and Moxibustion</i> . 2006;25(4):11-13.                                                                                                                                             | Not compared with sham control         |
| 427 | Zhou W, Wang LP, Liu H, Bian G. Influence of Scalp Acupuncture on Serum Tumor Necrosis Factor in Patients with Acute Cerebral Infarction. <i>Shanghai Journal of Acupuncture and Moxibustion</i> . 2002;21(1):11-12.                                                                                                                                                     | Not compared with sham control         |
| 428 | Xing YL, et al. Influence of Scalp Acupuncture on Hemodynamics in Windstroke Patients. <i>Chinese Acupuncture &amp; Moxibustion</i> . 1994;(4):37-38.                                                                                                                                                                                                                    | Compared two types of acupuncture      |
| 429 | Yushan F, Xiaohua T, Qiong W. Influence of the shallow thorn acupuncture combine with Tongqiao Huoxue soup to levels of blood plasma TXB2 and 6-keto-PGF1 $\alpha$ on rats with cerebral infarction. <i>Modern journal of integrated Chinese traditional and western medicine</i> . 2008;17(9):1305-1320.                                                                | Complex therapy                        |
| 430 | Li YX, Zhang GB, Chen YH, Li Y, Mei CJ. Influences of Acupuncture Prescriptions on Serum GMP-140 and Their Clinical Effects in Stroke Patients. <i>Shanghai Journal of Acupuncture and Moxibustion</i> . 2008;27(3):3-4.                                                                                                                                                 | Compared two types of acupuncture      |
| 431 | Wang PQ, Wang J, Zhou HF. Influences of Eye Acupuncture on Neural Deficit and Plasma Fibrinogen Level in Acute Cerebral Infarction Patients. <i>Shanghai Journal of Acupuncture and Moxibustion</i> . 2008;27(3):5-7.                                                                                                                                                    | Not compared with sham control         |
| 432 | Tan F, Wan SY, Wang HQ. Interventional effect of electro-acupuncture on axon growth and inhibitive factor. <i>Chinese Journal of Clinical Rehabilitation</i> . 2006;10(23):152-154.                                                                                                                                                                                      | Not clinical trial                     |
| 433 | Lee SY. Intradermal acupuncture on Shen-Men and Nei-Kuan acupoints improves insomnia of stroke patients by reducing sympathetic nervous activity. Master's Thesis in Kyunghee University. 2009.                                                                                                                                                                          | Not focus on functional recovery       |
| 434 | Kim YS, Lee SH, Jung WS, Park SU, Moon SK, Ko CN, Cho KH, Bae HS. Intradermal Acupuncture on Shen-Men and Nei-Kuan Acupoints in Patients With Insomnia After Stroke. <i>The American Journal of Chinese Medicine</i> . 2004;32(5):771-778.                                                                                                                               | Not focus on functional recovery       |
| 435 | Streitberger K, Kleinhenz J. Introducing a placebo needle into acupuncture research. <i>Lancet</i> . 1998;352(9125):364-365.                                                                                                                                                                                                                                             | Not clinical trial                     |
| 436 | Xie BD, Zhang LT. Investigation Evolution of Apoplexy Treated by Acupuncture Therapy and Rehabilitative Treatment. <i>Medical Recapitulate</i> . 2008;14(20):3165-3167.                                                                                                                                                                                                  | Not clinical trial                     |
| 437 | Guan JL, Li YJ, Zhang BT. Investigation of combination of exercise therapy and acupuncture-therapy on acute cerebral infarction. <i>Hebei Journal of Traditional Chinese Medicine</i> . 2007;29(9):780-781.                                                                                                                                                              | Complex therapy                        |
| 438 | Wang F, Ouyang G, Jia SW. Investigation on effects of acupuncture at scalp motor areas of different sides on cerebral blood flow in the patient of stroke by means of photon emission computed tomography. <i>Chinese Acupuncture &amp; Moxibustion</i> . 2004;24(5):343-346.                                                                                            | Compared two types of acupuncture      |
| 439 | Li GH, Chen H, He YF, et al. Investigation on the effect of needling combined with partial body weight support system(PBWS) training on the balance function of stroke Patients. <i>Journal of Clinical Acupuncture and Moxibustion</i> . 2006;22(6):11-13.                                                                                                              | Complex therapy                        |
| 440 | Zhang W, Wang J. Joint treatment of apoplexy sequela by tongue acupuncture and head acupuncture. <i>Journal of Liaoning University of Traditional Chinese Medicine</i> . 2009;11(3):146-147.                                                                                                                                                                             | Compared two types of acupuncture      |
| 441 | Yeo JJ, Jang IS, Yoo G, Jeong EH, Kim LK. Korean medical treatment and language therapy in patient with fluent aphasia after stroke; case report. <i>Journal of Oriental Neuropsychiatry</i> . 2006;17(1):137-143.                                                                                                                                                       | Not focus on functional recovery       |
| 442 | Kim YS, Wang J, Mann D, Gaylord S, Lee HJ, Lee M. Korean Oriental Medicine in Stroke Care. <i>Complementary Health Practice Review</i> . 2005;10(2):105-117.                                                                                                                                                                                                             | Not clinical trial                     |
| 443 | Schockert T, Schnitker R, Boroojerdi B, et al. Kortikale Aktivierungen durch Yamamoto Neue Schädelakupunktur (YNSA) in der Behandlung von Schlaganfallpatienten - Eine Sham-kontrollierte Studie mit Hilfe der funktionellen Kernspintomographie (fMRI). <i>KIM - Komplementäre und Integrative Medizin, Arztezeitschrift für Naturheilverfahren</i> . 2009;50(4):46-54. | Duplicated article                     |
| 444 | Ye SL. Lacunar Cerebral Infarction 56 Cases Treated with Bushen Tongluo Decoction. <i>Journal of Zhejiang University of Traditional Chinese Medicine</i> . 2006;30(3):261-262.                                                                                                                                                                                           | Not related to efficacy of acupuncture |
| 445 | Naeser MA, Alexander MP, Stiassny-Eder D, Galler V, Hobbs J, Bachman D, Lannin LN. Laser acupuncture in the treatment of paralysis in stroke patients; A CT scan lesion site study. <i>American Journal of Acupuncture</i> 1995;23(1):13-28.                                                                                                                             | Not randomized controlled trial        |

|     |                                                                                                                                                                                                                                                                                                                            |                                        |
|-----|----------------------------------------------------------------------------------------------------------------------------------------------------------------------------------------------------------------------------------------------------------------------------------------------------------------------------|----------------------------------------|
| 446 | Xu ZQ, Zhou BR, Liang YL, et al. Long effect of early comprehensive rehabilitation patients with cerebral infarction. <i>Modern Rehabilitation</i> . 2001;5(6):22-23.                                                                                                                                                      | Not related to efficacy of acupuncture |
| 447 | Guo RY, Liu LA, Ma XW, et al. Long-term Effect of Acupuncture on Quality of Life in Patients with Early Stage of Stroke. <i>Chinese journal of integrated traditional and Western medicine</i> . 2007;27(8):708-710.                                                                                                       | Not compared with sham control         |
| 448 | Li T, Tian GJ, Zhang L, et al. Low Dose of Mannitol with Acupuncture for Hypertensive Cerebral Hemorrhage. <i>Chinese Journal of Integrative Medicine on Cardio-/Cerebrovascular Disease</i> . 2006;4(11):960-961.                                                                                                         | Complex therapy                        |
| 449 | Cho JH, Chung SH, Lee JS, Kim SS. MEMG analysis on antispastic effect of electroacupuncture and transcutaneous electrical nerve stimulation. <i>Journal of Oriental Rehabilitation Medicine</i> . 2006;16(2):131-143.                                                                                                      | Not compared with sham control         |
| 450 | Li N, Feng B, Zou J, et al. Meta-analysis of Acupuncture for Semiplegia Caused by Stroke. <i>Journal of Chengdu University of TCM</i> . 2002;25(2):37-39.                                                                                                                                                                  | Not clinical trial                     |
| 451 | Li H, Liang WX, Guo XF. Meta-analysis of Consciousness-Restoring and Orifice-Opening Acupuncture Manipulation in Treating Stroke. <i>Journal of Guangzhou University of Traditional Chinese Medicine</i> . 2004;21(3):215-219.                                                                                             | Not clinical trial                     |
| 452 | Zheng GQ. Methodological Standards for Experimental Research on Stroke Using Scalp Acupuncture. <i>Acupuncture &amp; electro-therapeutics research</i> . 2009;34(1/2):1-14.                                                                                                                                                | Not clinical trial                     |
| 453 | Yang ZX, Bian JL, Xu JF, Shen PF, Xiong J, Guo JK, Zhang ZL, Li J, Shi X. Multi-central controlled study on acupuncture for treatment of cerebral infarction in restoration stage. <i>Chinese Acupuncture &amp; Moxibustion</i> . 2008;28(4):239-243.                                                                      | Compared two types of acupuncture      |
| 454 | Chen W, Gu HW, Ma WP, Li QS, Yu Q, Liu XQ, Liu SH, Li WH, Liu HL, Dai MT. Multicentral randomized controlled study on effects of acupuncture at Zusanli (ST 36) and Xuanzhong (GB 39) on cerebrovascular function in the patient of ischemic stroke. <i>Chinese Acupuncture and Moxibustion</i> . 2006;26(12):851-853.     | Not compared with sham control         |
| 455 | Xie JH. Multidisciplinary Treatments Used for Stroke-induced Dysphagia; A 84 Cases Report. <i>Chin J Rehabil Theory Practice</i> . 2006;12(8):671-672.                                                                                                                                                                     | Complex therapy                        |
| 456 | Chen SJ, Li H. Multifactor analysis on the curative effect of acupuncture in patients with cerebral infarction. <i>Chinese Journal of Clinical Rehabilitation</i> . 2005;9(41):4-5.                                                                                                                                        | Compared two types of acupuncture      |
| 457 | Fink M, Rollnik JD, Bijak M, et al. Needle acupuncture in chronic poststroke leg spasticity. <i>Arch Phys Med Rehabil</i> . 2004;85(4):667-672.                                                                                                                                                                            | Included                               |
| 458 | Ahn SG, Kang HJ, Song HC, Bom HS. New Model of Verification for Demonstration of Neuronal Basis of Acupuncture by Comparison of Two Different Methods of Acupuncture which Increase Regional Cerebral Blood Flow ( rCBF ) on SPECT. <i>The Journal of Korean Acupuncture and Moxibustion Society</i> . 2000;17(2):247-259. | Not clinical trial                     |
| 459 | New Study Suggests Acupuncture Can Improve Recovery, Physical Functioning in Stroke Patients. Editorial Staff. <i>Acupuncture Today</i> . 2005;6(4)                                                                                                                                                                        | Not clinical trial                     |
| 460 | Yang G, Zhao Y. Observation of acupuncture treatment on cerebral infarction ambliopia. <i>Hebei J TCM</i> . 2007;29(5):449-450.                                                                                                                                                                                            | Not compared with sham control         |
| 461 | Song S, Ji Y, Han H. Observation of combination of acupuncture and deglutition training on deglutition obstacle post-cerebral apoplexy. <i>Hebei Journal of Traditional Chinese Medicine</i> . 2008;30(11):1189-1190.                                                                                                      | Complex therapy                        |
| 462 | Wang LJ. Observation of the effectiveness of intervention of nursing care of improving quality of life of patients with stroke. <i>Journal of Q LU NURSNG</i> . 2006;12(4):599.                                                                                                                                            | Not related to efficacy of acupuncture |
| 463 | Liu JF, Qu YW. Observation on Clinical Effect of Angelica Injection in Treating Cerebral Infarction Sequela Through Stimulating Nerve Root. <i>Chinese Archives of Traditional Chinese Medicine</i> . 2006;24(8):1495-1496.                                                                                                | Not related to efficacy of acupuncture |
| 464 | Zhang ZM, Feng CL, Pi ZK, Fan XY, Chen HQ, Zhang J. Observation on clinical therapeutic effect of acupuncture on upper limb spasticity in the patient of poststroke. <i>Chinese acupuncture &amp; moxibustion</i> . 2008;28(4):257-60.                                                                                     | Not compared with sham control         |
| 465 | Wang Li, Yan DY. Observation on clinical therapeutic effect of mother-son reinforcing-reducing method on stroke at restoration stage. <i>Chinese Acupuncture &amp; Moxibustion</i> . 2005;25(5):309-311.                                                                                                                   | Compared two types of acupuncture      |
| 466 | Zheng DF, Wu ZY, Duan LJ. Observation on curative efficacy of treating of apoplexy hemiplegic with acupuncture massage and early rehabilitation functional training. <i>Acta Academiae Medicinae CPAF</i> . 2009;18(2):130-132.                                                                                            | Complex therapy                        |
| 467 | Xu YH, Li Q, Hao YQ. Observation on the Efficacy of Acupuncture plus Rehabilitation Composite Treatment for Apoplectic Aphasia. <i>Shanghai Journal of Acupuncture and Moxibustion</i> . 2005;24(8):30-31.                                                                                                                 | Compared two types of acupuncture      |
| 468 | Deng BY, Zhou EH, Su SY, Li YF. OBSERVATION ON THE THERAPEUTIC EFFECT OF ACU-MOXIBUSTION OF DIFFERENT ACUPOINT GROUPS IN STROKE PATIENTS IN CONVALESCENCE STAGE. <i>World Journal of Acupuncture-Moxibustion</i> . 2005;15(2):3-9.                                                                                         | Compared two types of acupuncture      |
| 469 | Qu Y, Jiang Y, Liu SX, He CQ, Xio SF. Observation on the Therapeutic Effect of Acupuncture and Massage for Treatment of Lower-limb Dysfunction in Stroke Patients. <i>Acupuncture Research</i> . 2003;28(4):267-269.                                                                                                       | Complex therapy                        |
| 470 | Li YQ. Observation on the Therapeutic Effect of Combined Acupuncture Therapy on Dysphagia from Pseudobulbar Palsy in 54 Cases of Stroke Patients. <i>Acupuncture Research</i> . 2006;31(6):359-361.                                                                                                                        | Complex therapy                        |

|     |                                                                                                                                                                                                                                                                    |                                        |
|-----|--------------------------------------------------------------------------------------------------------------------------------------------------------------------------------------------------------------------------------------------------------------------|----------------------------------------|
| 471 | Wang K, Li YH, Wang SX. OBSERVATION ON THE THERAPEUTIC EFFECT OF CT-AIDED SURROUNDING NEEDLING IN THE TREATMENT OF ISCHEMIC STROKE AND CHANGES OF PLASMA CATECHOLAMINE LEVEL. <i>World Journal of Acupuncture-Moxibustion</i> . 2003;13(1):10-13.                  | Compared two types of acupuncture      |
| 472 | Bian J, Zhang C, Li J, Zhang Y, Ding S, He J, Shi X. Observation on therapeutic effect of activating brain function to cause resuscitation needling method on deglutition disorders after stroke. <i>Chinese Acupuncture and Moxibustion</i> . 2005;25(5):307-308. | Uncontrolled trial                     |
| 473 | Huang XJ, Yan YD, Xie N, Qin HJ, Xiong L, Wang LL. Observation on Therapeutic Effect of Acupuncture Combined with Chinese Herbal Medicine in Sequela of Wind Stroke. <i>World Journal of Integrated Traditional and Western Medicine</i> . 2008;3(12):730-732.     | Not compared with sham control         |
| 474 | Shi ZX. Observation on therapeutic effect of acupuncture for treatment of pseudobulbar palsy. <i>Journal of Clinical Acupuncture and Moxibustion</i> . 2006;22(5):11-12.                                                                                           | Complex therapy                        |
| 475 | Hai Y, Yu X. Observation on therapeutic effect of acupuncture on spastic dyskinesia due to stroke. <i>Chinese Acupuncture &amp; Moxibustion</i> . 2007;27(10):735-737.                                                                                             | Compared two types of acupuncture      |
| 476 | Liu DR, Hao SF, Liu ZY. Observation on therapeutic effect of acupuncture on stroke by "Najia method of Ziwu Liuzhu. <i>Chinese Acupuncture and Moxibustion</i> . 2009;29(5):353-356.                                                                               | Compared two types of acupuncture      |
| 477 | Bai HM, Zhang YL, He JW, Zhang LC, Yang Y. Observation on therapeutic effect of comprehensive therapy for acute large area cerebral infarction. <i>Chinese Acupuncture &amp; Moxibustion</i> . 2008;28(2):98-100.                                                  | Complex therapy                        |
| 478 | Wang QY. Observation on therapeutic effect of electroacupuncture at points of different channels at different stages on hemiplegia after apoplexy. <i>Chinese Acupuncture &amp; Moxibustion</i> . 2006;26(1):33-35.                                                | Compared two types of acupuncture      |
| 479 | Hong JB, Sheng PJ, Yuan YQ, Yi SX, Yue ZH. [Observation on therapeutic effect of opposing needling for treatment of poststroke shoulder-hand syndrome]. <i>Chinese Acupuncture and Moxibustion</i> . 2009;29(3):205-208.                                           | Compared two types of acupuncture      |
| 480 | Wang BQ, Zhou P, Zhu YP. Observation on therapeutic effect of scalp acupuncture combined with body acupuncture on stroke. <i>Chinese Acupuncture &amp; Moxibustion</i> . 2005;25(4):240-242.                                                                       | Compared two types of acupuncture      |
| 481 | Gao B, Sun Y, Cong A, et al. Observation on therapeutic effects of acupuncture in 162 cases of cerebrovascular diseases. <i>Chinese Acupuncture and Moxibustion</i> . 2004;24(1):17-19.                                                                            | Not compared with sham control         |
| 482 | Chao WB. Observation on therapeutic effects of restoring consciousness and inducing resuscitation manipulation and traditional Chinese medicine acupuncture in 600 cases of cerebrovascular diseases. <i>World Health Digest</i> . 2006;3(8):16-18.                | Complex therapy                        |
| 483 | Meng SY, Cheng SQ, Zhang H, Ren LH, Zhang J, Zhang XJ, Xue SF. Observation on Xingnao-Kaigiao acupuncture for treatment of cerebral infarction. <i>Chin J TCM WM Crit Care</i> . 2006;13(5):306-308.                                                               | Compared two types of acupuncture      |
| 484 | Zhou ZL, Yang JR. Observations on the Clinical Effect of Pricking Blood Therapy on Unilateral Sensory Disturbance in Cerebrovascular Diseases. <i>Shanghai Journal of Acupuncture and Moxibustion</i> . 2004;23(5):6-7.                                            | Not related to efficacy of acupuncture |
| 485 | Wang YH, Ying SG. Observations on the Curative Effect of Acupuncture on Postapoplectic Pseudobulbar Paralysis. <i>Shanghai Journal of Acupuncture and Moxibustion</i> . 2006;25(6):15-16.                                                                          | Not compared with sham control         |
| 486 | Wang J, Bai L. Observations on the curative effect of combined scalp and body acupuncture on cerebral infarction. <i>Shanghai Journal of Acupuncture and Moxibustion</i> . 2006;25(11):8-9.                                                                        | Compared two types of acupuncture      |
| 487 | Qiu XL, Qiu H, Huang Y, Wu SR, Qian Q, Qiu XE. Observations on the curative effect of hook needle acupuncture on shoulder pain after apoplectic hemiplegia. <i>Shanghai Journal of Acupuncture and Moxibustion</i> . 2006;25(7):10-12.                             | Compared two types of acupuncture      |
| 488 | Zhang Y. Observations on the Curative Effect of Scalp Surrounding Acupuncture on 30 Cerebral Hemorrhage Patients. <i>Shanghai Journal of Acupuncture and Moxibustion</i> . 2004;23(4):5-6.                                                                         | Not compared with sham control         |
| 489 | Zhao CR, Zhen Y, Zhang Y. Observations on the Effect of acupuncture for Treatment of 46 Patients with Apoplectic Aphasia. <i>Shanghai Journal of Acupuncture and Moxibustion</i> . 2004;23(5):13-14.                                                               | Not compared with sham control         |
| 490 | Zhou KB, Chen SJ, Huang DJ, Peng Y, Liu B. Observations on the Effects of Kidney-reinforcing, Heart-nourishing and Du meridian-unblocking Acupuncture on Stroke and Apolipoprotein. <i>Shanghai Journal of Acupuncture and Moxibustion</i> . 2004;23(5):3-5.       | Compared two types of acupuncture      |
| 491 | Liu WH, Du YH. Observations on the Efficacy of Acupuncture of Points of Three Hand Yang Meridians for Treating Postapoplectic Finger Contracture. <i>Shanghai Journal of Acupuncture and Moxibustion</i> . 2007;26(3):15-16.                                       | Compared two types of acupuncture      |
| 492 | Sun YZ, Wang LJ. Observations on the Efficacy of Acupuncture plus Transcranial Ultrasound Therapeutic Instrument for Treating Cerebral Hemorrhage of Convalescent Stage. <i>Shanghai Journal of Acupuncture and Moxibustion</i> . 2007;26(2):17-18.                | Compared two types of acupuncture      |
| 493 | Qiyang LX, Pan CX, Wu YH, Wu BQ, Zhu GQ. Observations on the Efficacy of Brain-activating Yin Yang Point-through-point Acupuncture in Treating Acute Cerebral Infarction. <i>Shanghai Journal of Acupuncture and Moxibustion</i> . 2007;26(12):11-13.              | Compared two types of acupuncture      |
| 494 | Zhang Y, Jiang Y. Observations on the Efficacy of Combined Acupuncture and Medicine for Treating 30 Post-stroke Depression Patients. <i>Shanghai Journal of Acupuncture and Moxibustion</i> . 2007;26(4):5-6.                                                      | Not compared with sham control         |
| 495 | Wang SZ. Observations on the Efficacy of Combined Acupuncture and Medicine for Treating 50 Pseudobulbar Paralysis Patients. <i>Shanghai Journal of Acupuncture and Moxibustion</i> . 2005;24(12):12-13.                                                            | Not compared with sham control         |

|     |                                                                                                                                                                                                                                                                                     |                                        |
|-----|-------------------------------------------------------------------------------------------------------------------------------------------------------------------------------------------------------------------------------------------------------------------------------------|----------------------------------------|
| 496 | Mao KY, Guo Z. Observations on the Efficacy of Combined Acupuncture and Medicine for Treating Epilepsy Secondary to Cerebral Infarction. <i>Shanghai Journal of Acupuncture and Moxibustion</i> . 2005;24(6):17-18.                                                                 | Complex therapy                        |
| 497 | Zhang JW, Zhang LC, Guo JK. Observations on the Efficacy of 'Regulating Mind and Unblocking Meridian' Needling Method for Treating Cerebral Infarction. <i>Shanghai Journal of Acupuncture and Moxibustion</i> . 2007;26(11):8-10.                                                  | Compared two types of acupuncture      |
| 498 | Mu YY, Li ZR, Cheng J, Bao C, Hu JL, Yang GX. Observations on the Influence of Acupuncture on Serum IL-6 and IL-8 in Patients with Acute Cerebral Infarction. <i>Shanghai Journal of Acupuncture and Moxibustion</i> . 2008;27(11):3-5.                                             | Not compared with sham control         |
| 499 | Lu YY. Observations on the Intervening Effect of Acupuncture on Prodromal Symptoms of Stroke. <i>Shanghai Journal of Acupuncture and Moxibustion</i> . 2008;27(10):10-11.                                                                                                           | Not compared with sham control         |
| 500 | Zeng XQ, Li Y, Teng DS, Yang T. Observations on the Therapeutic Effect of Acupuncture on Postapoplectic Foot Drop. <i>Shanghai Journal of Acupuncture and Moxibustion</i> . 2008;27(1):23-24.                                                                                       | Not compared with sham control         |
| 501 | Fu W, Fan L, Meng C, Li W, Mi J. OCULO-ACUPUNCTURE TREATMENT OF CEREBRAL INFARCTION INDUCED HEMIPLEGIA. <i>World journal of acupuncture-moxibustion</i> . 2002;12(2):7-11.                                                                                                          | Not compared with sham control         |
| 502 | Han KH, Park EJ, Lee HJ, Na WK, Jang SJ, Ahn JS. One case of stroke in childhood. <i>J Korean Oriental Pediatrics</i> . 2004;18(2):21-30.                                                                                                                                           | Not related to efficacy of acupuncture |
| 503 | Kim SJ, Kim MS, Seo BI, Gu DM, Seo HG, An HD. One case report of urinary and bowel dysfunction treated with Yangkyuksanwha-tang in cerebrovascular accident patient. <i>Kor J Herbology</i> . 2003;18(3):1-8.                                                                       | Not related to efficacy of acupuncture |
| 504 | Fan GQ, Wang H, Wu X, et al. Optimization of Acupuncture Treatment Program for Upper Limb Paralysis and Its Effect on Blood Endothelin in Patients with Cerebral Infarction. <i>Chinese journal of integrated traditional and Western medicine</i> . 2003;23(2):102-105.            | Compared two types of acupuncture      |
| 505 | Kim YJ, Kim MY, Lee SY, Choi WW, Leem JT, Hwang JW, Jung WS, Moon SK, Cho KH, Kim YS. Outcome of stroke management in the hospital of oriental medicine: measurement by NIHSS and MBI. <i>The Journal of Korean Oriental Internal Medicine</i> . 2008;spr(1):82-87.                 | Uncontrolled trial                     |
| 506 | Zhang TS, Guan F, Jin CN, Hao CY, Liu XG, Ji LX. Overview of relation between retaining time of acupuncture and effect for apoplexy. <i>Acupuncture Research</i> . 2009;34(2):140-142.                                                                                              | Not clinical trial                     |
| 507 | Napadow V, Kaptchuk TJ. Patient Characteristics for Outpatient Acupuncture in Beijing, China. <i>The Journal of Alternative and Complementary Medicine</i> . 2004;10(3):565-572.                                                                                                    | Not related to stroke                  |
| 508 | Shah SH, Engelhardt R, Ovbiagele B. Patterns of complementary and alternative medicine use among United States stroke survivors. <i>J Neurol Sci</i> . 2008;271(1-2):180-185.                                                                                                       | Not clinical trial                     |
| 509 | Lee YK, Lee YK, Seo BM, Yun JS, Kim KU, Choi SH, Lee KM, Lim SC, Seo JC, Jung TY, Han SW. Pilot Study on The Thermographic Change of Seven Acupoints by Digital Infrared Thermographic Imaging. <i>Journal of Korean Institute of Herbal Acupuncture</i> . 2005;8(3):115-121.       | Not randomized controlled trial        |
| 510 | Huang DH, Wang CY, Huang JH, Ye Y, Chen XH. Point-injection therapy combining baihui acupuncture with parenteral solution of breviscapine for post-cerebral infarction depression. <i>Chinese Journal of Clinical Rehabilitation</i> . 2004;8(28):6132-6133.                        | Complex therapy                        |
| 511 | Wang Q, Peng Y, Chen S, et al. Pretreatment with electroacupuncture induces rapid tolerance to focal cerebral ischemia through regulation of endocannabinoid system. <i>Stroke; A Journal Of Cerebral Circulation</i> . 2009;40(6):2157-2164.                                       | Animal study                           |
| 512 | Huang QH, Tan JW, Li JJ, Qiu QW. Prognosis ameliorated by the combination of traditional Chinese medicine and western medicine in patients with acute stroke; A randomized control observation to 92 patients. <i>Chinese Journal of Clinical Rehabilitation</i> . 2004;8(1):22-23. | Complex therapy                        |
| 513 | Wu XJ. Progress of acupuncture and tuina for shoulder joint subluxation following apoplexy. <i>Journal of acupuncture and tuina science</i> . 2008;6(1):21-23.                                                                                                                      | Complex therapy                        |
| 514 | Chi XL, Li ZG, Guo ZR, Zhou L, Man HH, Dong CY, Bi KP. Progress of Studies on the Mechanism of Acupuncture Treatment of Acute Ischemic Cerebral Stroke. <i>Acupuncture Research</i> . 2007;32(4):285-288.                                                                           | Not clinical trial                     |
| 515 | Lu J, Dong Q. Progress on rehabilitation treatment of apoplexy patients with aphasia [Chinese]. <i>Chinese Nursing Research</i> . 2009;23(1A):10-12.                                                                                                                                | Not clinical trial                     |
| 516 | Wang XR, Lu ZP, Wang ZH, Wang YS, Qin LF. Protective effects of acupuncture combined with hypothermia on myocardial ischemia-reperfusion injury after coronary artery bypass graft. <i>The Journal of Practical Medicine</i> . 2005;21(20):2248-2251.                               | Not related to stroke                  |
| 517 | Kong J, Fufa DT, Gerber AJ, Rosman IS, Vangel MG, Gracely RH, Gollub RL. Psychophysical outcomes from a randomized pilot study of manual, electro, and sham acupuncture treatment on experimentally induced thermal pain. <i>J Pain</i> . 2005;6(1):55-64.                          | Not related to stroke                  |
| 518 | Liang D, Zhao Y. Puncturing the empirical point shengen in treatment of 101 cases of apoplectic hemiplegia. <i>J Tradit Chin Med</i> . 1994;14(2):110-114.                                                                                                                          | Not randomized controlled trial        |
| 519 | Rabadi MH. Randomized Clinical Stroke Rehabilitation Trials in 2005. <i>Neurochem Res</i> . 2007;32(4-5):807-21.                                                                                                                                                                    | Not clinical trial                     |
| 520 | Tang Q, Zhang L, Wei TH, Wang Y, Bai J, Li HT. Randomized controlled clinical trials for electro-needle treatment of motor dysfunction in cerebral infarction patients. <i>Acupuncture Research</i> . 2009;34(3):193-197.                                                           | Compared two types of acupuncture      |
| 521 | Yang ZX, Bian JL, Xu JF, Shen PF, Xiong J, Guo JK, Zhang ZL, Li J, Shi XM. Randomized controlled trial on mind-refreshing and orifice-opening needling method and cerebral infarction. <i>Journal of acupuncture and tuina science</i> . 2008;6:8-12.                               | Compared two types of acupuncture      |
| 522 | Naeser M, Alexander M, Stiassny-Eder D, Galler V, Hobbs J, Bachman D. Real versus sham acupuncture in the treatment of paralysis in acute stroke patients: a CT lesion site study. <i>J Neurol Rehabil</i> . 1992;6:163-173.                                                        | Included                               |

|     |                                                                                                                                                                                                                                                                                                        |                                        |
|-----|--------------------------------------------------------------------------------------------------------------------------------------------------------------------------------------------------------------------------------------------------------------------------------------------------------|----------------------------------------|
| 523 | Zhao YD, Zheng JJ, Zheng KS. Recent Progresses Of Acupuncture Treatment Of Cerebral Hemorrhage. <i>World journal of acupuncture-moxibustion</i> . 2003;13(2):3-11.                                                                                                                                     | Not clinical trial                     |
| 524 | Lou BD, Zhang W, Liu Z, et al. Regulatory Effects of Balanced Muscular Tension Needling Method of Blood Lipid and Glucose in Post-stroke Patients with Spastic Paralysis. <i>Chinese J of Rehabilitation</i> . 2006;21(2):81-82.                                                                       | Compared two types of acupuncture      |
| 525 | Lang HJ, Zhu YX. Rehabilitation of dysphagia and cognition functional impairment after stroke. <i>Chin J Cardiovasc Rehabil Med</i> . 2007;16(1):5-7.                                                                                                                                                  | Not related to efficacy of acupuncture |
| 526 | Zhang HY, Lu QY, Zheng HY, et al. Rehabilitation of Extremity Motor Function in the Patients with Stroke by Physiotherapy in Combination with Acupuncture. <i>Chin J Rehabilitation</i> . 2000;15(2):78-79.                                                                                            | Complex therapy                        |
| 527 | He ZB, Lu YK, Chen DC. Rehabilitation of Knee Osteoarthritis in Stroke Patients. <i>Chin J Rehabil Theory Practice</i> . 2006;12(12):1033-1034.                                                                                                                                                        | Not related to efficacy of acupuncture |
| 528 | Qu Y, Sheng M, Jiang Y, Xiong S, He CQ, Luo ZM. Rehabilitation therapy centralized on facilitation and acupuncture on upper extremities spasm after stroke. <i>Chinese Journal of Clinical Rehabilitation</i> . 2003;7(1):136.                                                                         | Not related to efficacy of acupuncture |
| 529 | Lu YK, He ZB. Rehabilitative treatment for knee osteoarthritis in 28 hemiplegic patients after stroke. <i>Neural Regeneration Research</i> . 2007;2(11):702-704.                                                                                                                                       | Complex therapy                        |
| 530 | Sun XF, Xiao GR, Song JL. Relationship between the cognitive impairment in senile stroke patients and the restoration of activities of daily living. <i>Chinese Journal of Clinical Rehabilitation</i> . 2004;8(34):7806-7807.                                                                         | Not randomized controlled trial        |
| 531 | Guo Z. Releasing of Spasm Caused by Stroke Treated with Acupuncture at Daling Point. <i>Acupuncture Research</i> . 1998;3:196.                                                                                                                                                                         | Uncontrolled trial                     |
| 532 | Li YH, Jin R. RESEARCH ON SEQUELAE OF CEREBROVASCULAR ACCIDENT TREATED BY THREE DIFFERENT NEEDLING TECHNIQUES. <i>World Journal of Acupuncture-Moxibustion</i> . 1994;4(2):10-15.                                                                                                                      | Compared two types of acupuncture      |
| 533 | Ni GX, Ran QF. Research on the Regularity of Cerebral Infarction Treating by Combining Acupuncture and Medicine. <i>Liaoning Journal of Traditional Chinese Medicine</i> . 2008;35(12):1824-1825.                                                                                                      | Not clinical trial                     |
| 534 | Mao P, Xie Y, Li M. Research Survey of Acupuncture Function and Its Time Window in the Early Rehabilitation of Ischemic Stroke. <i>Chinese journal of integrated traditional and Western medicine</i> . 2009;29(6):566-569.                                                                            | Not clinical trial                     |
| 535 | Cai JZ, Pan JY. Scalp Acupuncture and Early Blood Vessel Reopening. <i>Shanghai Journal of Acupuncture and Moxibustion</i> . 2002;21(4):9-10                                                                                                                                                           | Not compared with sham control         |
| 536 | Magnusson M, Johansson K, Johansson BB. Sensory stimulation promotes normalization of postural control after stroke. <i>Stroke</i> . 1994;25(6):1176-1180.                                                                                                                                             | Not compared with sham control         |
| 537 | Seo JC, Kim JI, Kim YM, Nam TH, Baek YH, Choe BK, Kim YJ, Kim CJ, Chung JH, Yin CS, Kim EH, Han SW, Koh HK, Kim CH. Serotonin transporter gene polymorphism in Korean stroke patients - 277 case control study. <i>The Journal of Korean Acupuncture and Moxibustion Society</i> . 2002;19(1):111-117. | Not related to efficacy of acupuncture |
| 538 | Huang JB, Zeng HK, Zhen XF, Sun C, Li H. Short-term Effect of First-aid Acupoint Picking Blood Therapy on Acute Cerebral Infarction. <i>Shanghai Journal of Acupuncture and Moxibustion</i> . 2002;21(4):7-8.                                                                                          | Not related to efficacy of acupuncture |
| 539 | Zhu XJ, Gao WB, Yang XY. Shoulder subluxation after stroke treated with acupuncture combined with rehabilitative exercises. <i>Journal of Beijing University of Traditional Chinese Medicine</i> . 2007;14(3):23-25.                                                                                   | Not compared with sham control         |
| 540 | Rosler A, Otto B, Schreiber-Dietrich D, Steinmetz H, Kessler KR. Single needle acupuncture alleviates gag reflex during transesophageal echocardiography; a blinded, randomized, controlled pilot trial. <i>THE JOURNAL OF ALTERNATIVE AND COMPLEMENTARY MEDICINE</i> . 2003;9(6):847-849.             | Not related to stroke                  |
| 541 | White P, Bishop F, Hardy H, Abdollahian S, White A, Park J, Kaptchuk TJ, Lewith GT. Southampton needle sensation questionnaire: development and validation of a measure to gauge acupuncture needle sensation. <i>J Altern Complement Med</i> . 2008;14(4):373-379.                                    | Not clinical trial                     |
| 542 | Choi DY, Lee DI, Kim SY, Kim KS, Lee JD, Lee YH. Specific electric acupuncture for the management of the central poststroke pain. <i>EAST-WEST MEDICAL RESEARCH INSTITUTE JOURNAL</i> ;2003:171-177.                                                                                                   | Not compared with sham control         |
| 543 | Mao M, Chen X, Chen Y, Rao P, Liu J. Stage-oriented comprehensive acupuncture treatment plus rehabilitation training for apoplectic hemiplegia. <i>Journal of traditional Chinese medicine</i> . 2008;28(2):90-93.                                                                                     | Not compared with sham control         |
| 544 | Xu YL, Pen G, Wang XN, et al. Staging Acupuncture in Combination with Rehabilitation Treatment Technique for the Recovery of Extremities Inferior Motor Function in the Patients with Acute Stroke. <i>Chinese Journal of Rehabilitation</i> . 2006;21(5):306-307.                                     | Not compared with sham control         |
| 545 | Schnyer RN, Wayne PM, Kaptchuk TJ, Cheng X, Zhang Z, Stason WB. Standardization of individualized treatments in a randomized controlled trial of acupuncture for stroke rehabilitation. <i>J Altern Complement Med</i> . 2006;12(2):106-109.                                                           | Not clinical trial                     |
| 546 | Na GH, Lee DH, Jeong YP, Jeong HK, Lee EB, Ryu CR, Cho MR, Chae WS. Study of a patient with cerebral infarction treated by Sa-am's Ohaeng-acupuncture and Liuqi-acupuncture. <i>Korean Journal of Oriental Physiology and pathology</i> . 2006;20(3):735-739.                                          | Not focus on functional recovery       |
| 547 | Liu X, Wang S, Liu J, Zhou X, Xiao G, You X, Liu X. Study of Huatan Quyu decoction combined with acupuncture on ischemic stroke at acute stage. <i>Modern Journal of Integrated Traditional Chinese and Western Medicine</i> . 2008;17(32):4964-4966.                                                  | Not compared with sham control         |

|     |                                                                                                                                                                                                                                                                                                          |                                        |
|-----|----------------------------------------------------------------------------------------------------------------------------------------------------------------------------------------------------------------------------------------------------------------------------------------------------------|----------------------------------------|
| 548 | Liu DS, Guo YQ, Fu WB, Li YW. Study of Reinforcement the Effect of 'Piercing Jing-Points' Acupuncture on Hemiplegia in acute Cerebral infarction. Chinese Archives of Traditional Chinese Medicine. 2008;26(2):430-433.                                                                                  | Compared two types of acupuncture      |
| 549 | Sun B, Zhang CQ, Zhang JA, Wang JR. Study of synthetle treatment on acute cerebral infarction under. World Health Digest. 2006;3(8):10-11.                                                                                                                                                               | Complex therapy                        |
| 550 | Lee YK, Kim JS, Lee PJ. Study on effectiveness of Korean Medicine therapy and the relation between effectiveness of that and single nucleotide gene polymorphism in stroke patients. Korean Journal of Oriental Physiology and pathology. 2007;21(5):1307-1312.                                          | Not related to efficacy of acupuncture |
| 551 | Pi M, Rao XD, Cao XM, et al. Study on effects of different acupuncture therapies on serum Creactive protein level in patients with acute cerebral infarction. Journal of Clinical Acupuncture and Moxibustion. 2007;23(7):1-5.                                                                           | Compared two types of acupuncture      |
| 552 | Ding ZL, Zhou H, Zhou DA. Study on the Effect of Acupuncture in Strengthening the Spleen to Resolve Phlegm in the Treatment of Stroke and Its Mechanism. Acupuncture Research. 2005;30(2):109-112.                                                                                                       | Compared two types of acupuncture      |
| 553 | Ma YQ, Jin LT, Zhang J, et al. Study on the effect of treatment for kinetic function of stroke patients by acupuncture at different points of different stages. Journal of Clinical Acupuncture and Moxibustion. 2008;24(2):1-4.                                                                         | Compared two types of acupuncture      |
| 554 | Wang W, Liu L, Zhi X, Huang JB, Liu DX, Wang H, Kong XQ, Xu HB. Study on the Regulatory Effect of Electro-acupuncture on Hegu Point (LI4) in Cerebral Response with Functional Magnetic Resonance Imaging. Chin J Integr Med. 2007;13(1):10-16.                                                          | Enrolled healthy subjects              |
| 555 | Xing YL, Tang Q, Wei TH. Study on Therapeutic Effect of Head Acupuncture Combined with Acceleration Techniques on Stroke Patients Using the SIAS Appraisal Table. Neural Injury and Functional Reconstruction. 2007;2(1):23-25.                                                                          | Not compared with sham control         |
| 556 | Fu JM. Study progression of acupuncture on affected limb spasm after cerebral hemorrhage. Modern Journal of Integrated Traditional Chinese and Western Medicine. 2007;16(28):4245-4246.                                                                                                                  | Not clinical trial                     |
| 557 | He J, Zheng M, He C-Q, et al. Systematic assessment of acupoint stimulating therapy for deglutition disorders after apoplexy. Chinese Acupuncture and Moxibustion. 2009;29(1):66-71.                                                                                                                     | Not clinical trial                     |
| 558 | Zhang T, Zhang L, Zhang HM, Li Q. Systematic review of acupuncture therapy for acute ischemic stroke. China Journal of Traditional Chinese Medicine and Pharmacy. 2009;24(1):101-104.                                                                                                                    | Not clinical trial                     |
| 559 | Dai YJ, Zhang EH, Fan J. The acupuncture therapy and auricular-plaster therapy on 22 patients with stubborn hiccup after stroke. Chinese Journal of Clinical Rehabilitation. 2003;7(1):141.                                                                                                              | Not randomized controlled trial        |
| 560 | Zhu YW. The Advances of Experimental Research in Sequelae of Stroke by Acupuncture and Moxibustion in Recent Years. Acupuncture Research. 1998;23(2):91-94.                                                                                                                                              | Not clinical trial                     |
| 561 | Wang G, Liu D, He D. THE ASSESSMENT OF SCALP ACUPUNCTURE FOR TREATING ISCHEMIC STROKE. World journal of acupuncture-moxibustion. 1994;4(2):7-10.                                                                                                                                                         | Not compared with sham control         |
| 562 | Zhang C. The Brain Resuscitation Acupuncture Method for Treatment of Post Wind Stroke Mental Depression---A Report of 45 Cases. Journal of Traditional Chinese Medicine. 2005;25(4):243-246.                                                                                                             | Not compared with sham control         |
| 563 | Lee JD, Chon JS, Jeong HK, Kim HJ, Yun M, Kim DY, Kim DI, Park CI, Yoo HS. The cerebrovascular response to traditional acupuncture after stroke. Neuroradiology. 2003;45:780-784.                                                                                                                        | Uncontrolled trial                     |
| 564 | Zhang X, Yuan Y, Kuang P, Wu W, Zhang F, Liu J. The Changes of Vasoactive Intestinal Peptide Somatostatin and Pancreatic Polypeptide in Blood and CSF of Acute Cerebral Infarction Patients and the Effect of Acupuncture. Acupuncture Research. 1996;4:10-16.                                           | Not compared with sham control         |
| 565 | Sung KK, Hwang CY, Lee SK, Lee SY, Cheong SS, Kang SY, Lee JD. The clinical effect of high voltage AC field therapy(healthtron) on peripheral circulatory disturbance and functional outcome of rehabilitation in CVA patients. Korean Journal of Oriental Physiology and pathology. 2002;16(3):609-615. | Not related to efficacy of acupuncture |
| 566 | Wang Z, Zhu F. The clinical effect of subcutaneous electrical stimulation of the scalp on deglutition disorders during the subacute period of stroke. MEDICAL JOURNAL OF LIAONING. 2005;19(4):169-170.                                                                                                   | Not compared with sham control         |
| 567 | Kim JY, Jeong SM, Park CK, Min EK, Wang TC. The Clinical Effectiveness of Acupuncture at Palsa(BaXie) for Hand Function in Hemiparetic Patients after Stroke. The Journal of Korean Acupuncture and Moxibustion Society. 2008;25(5):97-104.                                                              | Compared two types of acupuncture      |
| 568 | Cheong BS, Choi DY, Kim KS, Lee DI. The Clinical Evaluation of East-West Medical Management for Central Poststroke Pain. Journal of Korean Institute of Herbal Acupuncture. 2001;4(2):95-103.                                                                                                            | Not randomized controlled trial        |
| 569 | Mu JP, Zhu ZM, Cheng JM, et al. The Clinical Observation on the Acupuncture Therapy Enlivenig Brain,Dredging Orifices Cooperating with Promoting Treatment for Hemiplegia after Stroke. Journal of Emergency in Traditional Chinese Medicine. 2007;16(5):520-521.                                        | Not related to efficacy of acupuncture |
| 570 | Wang JH, Xie QF. The Clinical Observation on the Applicaton of TCM Rehabilitation Care on Patients with Apoplexy in Acute Stage. Journal of Emergency in Traditional Chinese Medicine. 2006;15(4):337-338.                                                                                               | Complex therapy                        |
| 571 | Zhou RF, Zhao XL. The Clinical Observation on the Combined Therapy of TCM and WM for Cerebral Infarction in Acute Stage. Journal of Emergency in Traditional Chinese Medicine. 2007;16(3):265-266.                                                                                                       | Not related to efficacy of acupuncture |
| 572 | Kim EG, Kim SK, Han JH, Shim YS, Lee JH. The clinical report of asthmatic patients with CVA by treatment of Homins Placenta aqua-acupuncture. Journal of Korean Institute of Herbal Acupuncture. 7(3):123-129.                                                                                           | Pharmacopuncture                       |
| 573 | Gang YL, Hwang CW. The clinical study of 654 cases of CVA patients. Hyehwa Medical Journal. 2000;9(2):78-96.                                                                                                                                                                                             | Uncontrolled trial                     |
| 574 | Cheong BS, Yun HS, Cho SG, Lee JH, Seo JC, Choi DY, Park DS, Lee SH. The Clinical Study of Risk and Lifestyle Factors in Stroke(419 Case Control Study). The Journal of Korean Acupuncture and Moxibustion Society. 2001;18(6):14-26.                                                                    | Not randomized controlled trial        |

|     |                                                                                                                                                                                                                                                                                                  |                                        |
|-----|--------------------------------------------------------------------------------------------------------------------------------------------------------------------------------------------------------------------------------------------------------------------------------------------------|----------------------------------------|
| 575 | Joo JW, Choi YT. The Clinical Study of the Effect of Electroacupuncture and Moxibustion on Urinary Disturbance as a Complication of CVA. The Journal of Korean Acupuncture and Moxibustion Society. 1997;14(2):1-14.                                                                             | Not randomized controlled trial        |
| 576 | Lee JW, Nam HS, Kim CJ. The clinical study on 1 case of hypoglycemia and cerebral infarction. Hyeonha Medical Journal. 2000;9(2):123-133.                                                                                                                                                        | Not related to efficacy of acupuncture |
| 577 | Chen LP, Jiao WG, Liu LM, et al. The comparison of effects of comprehensive rehabilitation therapy and simple rehabilitation therapy on old acute stroke patients. Chin J Rehabil Theory Practice. 2005;11(6):461-462.                                                                           | Complex therapy                        |
| 578 | Kim SW, Pak IB, Kim CH, Seo JC, Youn HM, Jang KJ, Song CH. The Depressive effect of Acupuncture on Gangap-point and Depletion on Taech' u-point in Stroke Patients. The Journal of Korean Acupuncture and Moxibustion Society. 2002;19(5):28-34.                                                 | Not randomized controlled trial        |
| 579 | Park YS, Kim EM, Kim YI, Hong KE, Lee H. The Depressive effect of Sa-Am Acupuncture treatment in Stroke Patients. The Journal of Korean Acupuncture and Moxibustion Society. 2004;21(4):217-223.                                                                                                 | Not randomized controlled trial        |
| 580 | Liu WP, Lin ZZ, Tan HY, et al. The Effect of Acupuncture Treatment on the Early Rehabilitation in the Patients with Acute Cerebral Stroke. Journal of Hebei North University(Medical Edition). 2005;22(2):37-38.                                                                                 | Not compared with sham control         |
| 581 | Wang GA, Shi HY, Zhao XF. The Effect of Acupuncture Method Named Waking up Mind from Unconsciousness on 14-3-3 Protein Expression in Ischemic Apoplexy Rat Models Basal Ganglia. Shanxi Journal of Traditional Chinese Medicine. 2009;25(1):46-48.                                               | Animal study                           |
| 582 | Duan JG, Liu M. The effect of acupuncture on MBP mRNA expression in ischemic stroke rats. Chinese Journal of Rehabilitation Medicine. 2009;24(3):240-244.                                                                                                                                        | Animal study                           |
| 583 | Lo YL, Cui SL, Fook-Chong S. The effect of acupuncture on motor cortex excitability and plasticity. Neurosci Lett. 2005;384(1-2):145-9.                                                                                                                                                          | Not clinical trial                     |
| 584 | Fu L, et al. The Effect of Acupuncture on Myocardial Enzymogram in Cerebro- Cardiac Syndrome. Journal of Emergency in Traditional Chinese Medicine. 2005;14(2):100-101.                                                                                                                          | Compared two types of acupuncture      |
| 585 | Yang B, Zhang C, Feng G, Chen H. The Effect of Acupuncture on Plasma Endothelin Content in Cerebral Infarction Patients. A Clinical Study. Journal of Traditional Chinese Medicine. 2007;27(3):197-198.                                                                                          | Not compared with sham control         |
| 586 | Li J, Mo F, Zheng Z et al. The effect of acupuncture on psychotic disorder post stroke*a clinical,contrast study. Modern Rehabilitation. 2001;5(6):49-53.                                                                                                                                        | Not compared with sham control         |
| 587 | Wang L, Bian Y, Li J, Zhou W, Feng Y, Yang J. The Effect of Acupuncture on Serum Tumor Necrosis Factor in Patients with Acute Cerebral Infarction. International Journal of Clinical Acupuncture. 2007;16(3):197-200.                                                                            | Not compared with sham control         |
| 588 | Ding Y, Wu X, Huang W et al. The Effect of Acupuncture on the Content of Blood Plasma D-Dimer and Fib of Acute Cerebral Infarction-Suffering Patients. Journal of Hubei College of TCM. 2007;9(2):13-15.                                                                                         | Not compared with sham control         |
| 589 | Yang WQ, Guo KF, Wang JQ, et al. The effect of cognitive-sentiment and sensorium impairment on swallowing functional recovery after stroke. Chinese Journal of Rehabilitation Medicine. 2006;21(4):330-332.                                                                                      | Not related to efficacy of acupuncture |
| 590 | Seo JC, Chung WJ, Kim JH, Nam SS, Lee JD, Choi DY, Ahn BC, Park DS, Lee YH, Choi YT, Rhee JH. The Effect of Cranial and Penetrational Acupuncture on Recovery of Motor Disorder due to Stroke. Journal of Oriental Medicine. 1998;3(1):19-27.                                                    | Not compared with sham control         |
| 591 | Lin ZZ, Li WC, Huang BL, et al. The effect of early hyperbaric oxygen and acupuncture on hypertension patients with cerebral hemorrhage and limb dysfunction. Modern Rehabilitation. 2001;5(4):21-22.                                                                                            | Complex therapy                        |
| 592 | Park SW, Lee MG, Lee SW, Son JW, Kang BK, Park SM, Lee I, Moon BS. The Effect of Electroacupuncture by Yin and Yang meridians on Leg Spasticity of Stroke Patients. Korean J Orient Int Med. 2006;27(2):371-378.                                                                                 | Not randomized controlled trial        |
| 593 | Pei J, Sun L, Chen R, Zhu T, Qian Y, Yuan D. The Effect of Electro-Acupuncture on Motor Function Recovery in Patients with Acute Cerebral Infarction;A Randomly Controlled Trial. Journal of Traditional Chinese Medicine. 2001;21(4):270-272.                                                   | Not compared with sham control         |
| 594 | Mukherjee M, McPeak LK, Redford JB, Sun C, Liu W. The effect of electro-acupuncture on spasticity of the wrist joint in chronic stroke survivors. Arch Phys Med Rehabil. 2007;88(2):159-166.                                                                                                     | Not compared with sham control         |
| 595 | Lee SW, Yun JM, Son JW, Kang BG, Park SM, Yun HJ, Kim DJ, Kim TJ, Lee I, Shin YI, Moon BS. The effect of electroacupuncture on upper extremity spasticity of stroke patients. Korean Journal of Oriental Medicine. 2007;28(3):492-501.                                                           | Not compared with sham control         |
| 596 | Xie DL, Zhu LF, Liu HY, Zhen CY, Wang SX, Li J. The Effect of Electroacupuncture Plus Lower Limb Function Intensive Training on Lower Limb Function in Patients with Acute Cerebral Infarction. Shanghai Journal of Acupuncture and Moxibustion. 2004;23(8):21-22.                               | Not compared with sham control         |
| 597 | Lee SH, Kim EJ, Yun SP, Kim LD, Lee CR, Hong JW, Jeong DW, Moon SK, Cho KH, Kim YS. The effect of intradermal acupuncture on the patients suffering from insomnia after stroke. Korean Journal of Oriental Internal Medicine. 2004;25(1):138-148.                                                | Duplicated article                     |
| 598 | Moon SK, Kim YS, Park SU, Jung WS, Ko CN, Cho KH, Bae HS, Lee JD, Kim DY. The effect of Li4-Li11 electrical acupuncture at unaffected limb on cerebral blood flow in ischemic stroke patients using SPECT. The Journal of Korean Acupuncture and Moxibustion Society. 2004;21(1):111-118.        | Uncontrolled trial                     |
| 599 | Kim YS, Hong JW, Na BJ, Park SU, Jung WS, Moon SK, Park JM, Ko CN, Cho KH, Bae HS. The Effect of Low versus High Frequency Electrical Acupoint Stimulation on Motor Recovery After Ischemic Stroke by Motor Evoked Potentials Study. The American Journal of Chinese Medicine. 2008;36(1):45-54. | Compared two types of acupuncture      |

|     |                                                                                                                                                                                                                                                                                               |                                        |
|-----|-----------------------------------------------------------------------------------------------------------------------------------------------------------------------------------------------------------------------------------------------------------------------------------------------|----------------------------------------|
| 600 | Kim TH, Na BJ, Rhee JW, Lee CR, Park YM, Choi CM, Sun JJ, Jung WS, Moon SK, Park SW, Cho KH. The effect of Moxibustion at Chonjung(CV17, Shanzhong) on patients with dysphagia after stroke. <i>Korean Journal of Oriental Internal Medicine</i> . 2005;26(2):353-359.                        | Not related to efficacy of acupuncture |
| 601 | Youn HM, Kang KY, Lee JW. The effect of pressing at Kyeun-Jung, Gok-Ji and Zok-Sam-Li with Si-acupuncture on the decreasing of blood pressure and headache for the patients with stroke. <i>The Korean Journal of Meridian and Acupoint</i> . 2005;22(3):27-40.                               | Uncontrolled trial                     |
| 602 | Zou W, Feng X, Zhu C. The effect of scalp clustery acupuncture on MMP-9 in rats with cerebral infarction. <i>Chinese Journal of Rehabilitation Medicine</i> . 2009;24(2):146-149.                                                                                                             | Animal study                           |
| 603 | Baek YH, Seo JC, Lee JD. The effect of taping therapy on the activity of daily living of poststroke-hemiplegic patients: a clinical study. <i>The Journal of Korean Acupuncture and Moxibustion Society</i> . 2001;18(2):175-185.                                                             | Not related to efficacy of acupuncture |
| 604 | Guo YQ, Chen LY, Li WX, et al. The effect on stroke patient trunk control with acupuncture at back shu point combined with function ttraining on bed. <i>Modern Rehabilitation</i> . 2001;5(2):31-32.                                                                                         | Compared two types of acupuncture      |
| 605 | Jung WS, Park JM, Choi BO. The Effectiveness of Combination Therapy of Oriental Medicine and Western Medicine on Acute Stroke: a controlled study. <i>Korean J Orient Int Med</i> . 2001;22(3):393-396.                                                                                       | Not randomized controlled trial        |
| 606 | Youn YS, Shim WJ, Lee JS, Kim SS. The effectiveness of electroacupuncture stimulateously muscle pattern exercise for gait rehabilitation after stroke. <i>Journal of Oriental Rehabilitation Medicine</i> . 2004;14(1):77-90.                                                                 | Complex therapy                        |
| 607 | Youn YS, Chung SH, Lee JS. The effectiveness of exercising unaffected upper extremity in operating electroacupuncture after stroke. <i>J Oriental Rehab Med</i> . 2004;14(2):85-95.                                                                                                           | Not related to efficacy of acupuncture |
| 608 | Jung WS, Park JM, Choi BO. The Effectiveness of Oriental Medical Treatment on Acute Stroke in Korea. <i>Korean Journal of Oriental Medicine</i> . 2002;3(1):7-12.                                                                                                                             | Not related to efficacy of acupuncture |
| 609 | Cho SW, Go KH, Nsm JH, Kim MS, Lee SY, Lee IS, Son DY, Lee MJ. The effectiveness of Zingiberis Rhizoma herbal acupuncture therapy and bee venom herbal acupuncture therapy on the poststroke hemiplegic shoulder pain. <i>Journal of Oriental Rehabilitation Medicine</i> . 2005;15(4):77-87. | Pharmacopuncture                       |
| 610 | Choi YA, Suh SR, Suh BD. The effects of a rehabilitation program including Koryo Hand-Acupuncture on elderly people post-stroke. <i>J Korean Acad Funda Nurs</i> . 2004;11(3):281-291.                                                                                                        | Complex therapy                        |
| 611 | Song JC. The effects of electroacupuncture stimulation on shoulder subluxation and pain in hemiplegic stroke patients. <i>The Journal of Oriental Rehabilitation Medicine</i> . 1999;9(1):41-58.                                                                                              | Uncontrolled trial                     |
| 612 | Choi JH, Kim JS, Kim DI. The Effects of Electro-Acupuncture the Rat with Induced MCAO. <i>Journal of Korean oriental medical society</i> . 2009;30(3):70-78.                                                                                                                                  | Animal study                           |
| 613 | Lee MH, Park HS, Choi WC. The effects of herb extracts in cerebrovascular accidental patient. <i>The Korean Journal of Rehabilitation Nursing</i> . 2000;3(2):141-153.                                                                                                                        | Not related to efficacy of acupuncture |
| 614 | Han YJ, Lee JE, Bae HH, Jo CJ, Park YC, Kim BT. The effects of the Bang's scalp acupuncture on poststroke aphasia. <i>Korean Journal of Oriental Physiology and pathology</i> . 2003;17(6):1560-1563.                                                                                         | Case report                            |
| 615 | Guo YH, Yan TB, Lu XP, Hui-Chan CWY. The effects of transcutaneous electrical nerve stimulation on regional cerebral blood flow in patients with stroke. <i>Chin J Phys Med Rehabil</i> . 2006;28(11):747-751.                                                                                | Not related to efficacy of acupuncture |
| 616 | Yuan J, Zhang JH, Lin HL. The evaluation of EMG on the patients with brain stroke treated by nerve promoted acupuncture. <i>China Prac Med</i> . 2008;3(1):1-2.                                                                                                                               | Compared two types of acupuncture      |
| 617 | Zheng QH, Yang ZQ, Li Y. The Experience and Consideration in Psychological Rehabilitation to the Aphasia Patients Accepting Acupuncture Therapy after Apoplexy. <i>Journal of Clinical Acupuncture and Moxibustion</i> . 2008;24(11):34-37.                                                   | Not clinical trial                     |
| 618 | Kim EG, Park YY, Lee KH, Lee HB, Jang SI, Kim SK, Shim YS, Lee JH. The improvement two cases coughing and sputum sign sequela of pneumonia by Homins Placenta aqua-acupuncture. <i>Journal of Korean Institute of Herbal Acupuncture</i> . 6(3):65-73.                                        | Pharmacopuncture                       |
| 619 | Qu YG, Feng J, Zhang CY, Yang Y, Yu ZS. The Influence of Acupuncture on Somatosensory Evoked Potential in Patients with Acute Cerebral Infarction. <i>Shanghai Journal of Acupuncture and Moxibustion</i> . 2000;19(4):8-9.                                                                   | Compared two types of acupuncture      |
| 620 | Lu Q, Chen BX. The Influence of Blood-letting Therapy Plus Blood-activating Recipe on Cerebral Blood Flow in Patients with Cerebral Infarction. <i>Shanghai Journal of Acupuncture and Moxibustion</i> . 2000;19(4):10-11.                                                                    | Not related to efficacy of acupuncture |
| 621 | Ren L, Zhang WA, Fang NY, Wang JX. The influence of electro-acupuncture on neural plasticity in acute cerebral infarction. <i>Neurological Research</i> . 2008;30(9):985-989.                                                                                                                 | Animal study                           |
| 622 | Kim MB, Shin HD, Kim SS. The influences of electroacupuncture at interosseous muscle for hand function in hemiplegic patients after stroke. <i>Journal of Oriental Rehabilitation Medicine</i> . 2005;15(4):17-28.                                                                            | Not compared with sham control         |
| 623 | Huang JL, Li YH, Lin ZP. The Integrative Medicine Treatment for 51 Cases of Hypertensive Cerebral Hemorrhage. <i>CHINESE JOURNAL OF INTEGRATIVE MEDICINE ON CARDIO - / CEREBROVASCULAR DISEASE</i> . 2007;5(11):1054-1056.                                                                    | Not related to efficacy of acupuncture |
| 624 | Oh HH, Byun JY, Kim ID, Ahn SG, Mun HC, Hwang WJ, Lee GM, Lee BC, Cho JW, Yang GB. The Nuclear Medical Study on the Effect of LI4 Acupuncture on Cerebral Blood Flow. <i>The Journal of Korean Acupuncture and Moxibustion Society</i> . 2001;18(4):46-54.                                    | Not randomized controlled trial        |



|     |                                                                                                                                                                                                                                                    |                                        |
|-----|----------------------------------------------------------------------------------------------------------------------------------------------------------------------------------------------------------------------------------------------------|----------------------------------------|
| 625 | Kim ID, Oh HD, Song HC, Bom HS, Byun JY, Ahn SG. The nuclear medical study on the effect of ST36 electroacupuncture on cerebral blood flow. The Journal of Korean Acupuncture and Moxibustion Society. 2001;18(2):18-26.                           | Uncontrolled trial                     |
| 626 | Kong FR, Ye HH, Wang XT, et al. The observation of the effect of the complex therapy in treating the swallow barrier after stroke. Acta Medicinæ Sinica. 2007;20(1):30-31.                                                                         | Not compared with sham control         |
| 627 | Ko H, Lee E. The oriental medicine care's influence on the blood viscosity, hemodynamic change and bio-chemistry change in the Cb-infarction patients. The Journal of Thesis of Institute of Korean Medicine in Semyung University. 2001;3:99-105. | Uncontrolled trial                     |
| 628 | Woo YM, Shin BC, Nam Y. The Study of Brain Function Changes After Contralateral and Ipsilateral Application Of Electroacupuncture. The Journal of Korean Acupuncture and Moxibustion Society. 2003;20(1):22-34.                                    | Not randomized controlled trial        |
| 629 | Kim EJ, Lee JD, Kang SK. The Study on the Effectiveness of Acupuncture in Stroke Rehabilitation. The Journal of Korean Acupuncture and Moxibustion Society. 2005;22(1):211-221.                                                                    | Not clinical trial                     |
| 630 | Tang CL, et al. The Study on the Treatment of Acute Cerebral Infarction by Pressing Pellets on Auricular Points Combined with Acupoint Injecting. Journal of Emergency in Traditional Chinese Medicine. 2005;14(3):208,253.                        | Compared two types of acupuncture      |
| 631 | Fang GQ, Zhao Y, Lu Y, et al. The Systematic Analysis about the Stroke Unit of Traditional Chinese Medicine. Medicine and Philo sophy(Clinical Decision Making Forum Edition). 2006;27(10):69-71.                                                  | Not clinical trial                     |
| 632 | Li XG. The therapeutic action and effect on GMP-140 of patients with Ischemic apoplexy treated by acupuncture according to staging and differentiation of symptoms and signs choosing point. China Practical Medicine. 2009;4(6):13-14.            | Compared two types of acupuncture      |
| 633 | Wang Z. The therapeutic effects of electric acupuncture on post stroke depression. Chinese Journal of Rehabilitation Medicine. 2008;23(11):1032-1034.                                                                                              | Not compared with sham control         |
| 634 | Chen X, Lai X. Therapeutic Effect of Acupuncture for Apoplectic Pseudobulbar Palsy and Its Mechanism. Journal of Guangzhou University of Traditional Chinese Medicine. 2005;22(5):369-372.                                                         | Not compared with sham control         |
| 635 | Guan C, Guo G, Yu L. Therapeutic Effect of Acupuncture plus Deglutition Training on Patients with Dysphagia Caused by Brainstem Stroke. Journal of Medical Forum. 2009;30(4):19-21.                                                                | Not compared with sham control         |
| 636 | Shen P, Shi X. Therapeutic Effect of Joint-easing and Orifice-dredging Acupuncture on Swallowing Function and Blood Oxygen Saturation in Patients with Swallowing Disorder After Stroke. Journal of New Chinese Medicine. 2009;41(2):88-90.        | Not compared with sham control         |
| 637 | Zheng PH, Yan YF, Tao XF. Therapeutic Effect of Stroke Unit Plus Acupuncture on Cerebral Stroke in a Primary Hospital. Chinese journal of prevention and control of chronic non-communicable diseases. 2008;16(5):479-481.                         | Complex therapy                        |
| 638 | Wang XL, Zhang TF, Zhang HX, Mao HR, Huang GF. Therapeutic effects of acupoint injection at cervical Jiaji points and effects on ET and CGRP in the patient of ischemic stroke. Chinese Acupuncture & Moxibustion. 2007;27(2):93-95.               | Not related to efficacy of acupuncture |
| 639 | Liu YC, Zhang HX, Hu JJ, et al. Therapeutic effects of scalp-acupuncture in patients with vascular dementia induced by cerebral infarction: A randomized controlled trial. Journal of Chinese Integrative Medicine. 2008;6(8):806-809.             | Not compared with sham control         |
| 640 | Li YK, Wu J, Hu KM, Huang L. Therapeutic effects of Tui An Yun Jing Yi on stroke;compared with randomized group of acupuncture therapy. Chinese Journal of Clinical Rehabilitation. 2006;10(19):4-8.                                               | Not related to efficacy of acupuncture |
| 641 | Park YC, Chae JS, Eom JY, Son SS, Choe IS. Thermographic study on the effects of deep acupuncture at Hapkok(L14) in cerebrovascular hemiplegia. The Journal of Korean Acupuncture and Moxibustion Society. 2003;20(4):134-144.                     | Uncontrolled trial                     |
| 642 | Ock MK, Lim WK, Park SE, Kim CH, Jung KS. Three cases of stroke patinets with dysphagia with Dong-Si acupuncture therapy. The Journal of Korean Oriental Medical Ophthalmology and Otolaryngology and Dermatology. 2005;18(3):114-120.             | Not focus on functional recovery       |
| 643 | Sze FK, Wong E, Yi X, Woo J. Traditional Chinese acupuncture does not improve outcomes from post-stroke motor rehabilitation.Aust J Physiother. 2003;49(1):74.                                                                                     | Not clinical trial                     |
| 644 | Yan T, Hui-Chan CWY. Transcutaneous electrical stimulation on acupuncture points improves muscle function in subjects after acute stroke: A randomized controlled trial. Journal of Rehabilitation Medicine. 2009;41(5):312-316.                   | Not related to efficacy of acupuncture |
| 645 | Wu J. Treatment of 28 cases of hiccup following cerebral infarction by acupuncture. Journal of acupuncture and tuina science. 2008;6:19-20.                                                                                                        | Uncontrolled trial                     |
| 646 | Jia HL, Zhang YC. Treatment of 40 postapoplectic dysphagia patients by acupuncture plus rehabilitation training. Shanghai Journal of Acupuncture and Moxibustion. 2006;25(7):5-6.                                                                  | Not compared with sham control         |
| 647 | Fu WB, Fan L, Li WX. Treatment of Acute Cerebral Infarction by Eye Acupuncture. Shanghai Journal of Acupuncture and Moxibustion. 2001;20(3):14-15.                                                                                                 | Not compared with sham control         |
| 648 | Hou ZM, Dai E, Zheng DM, Shi QG, Wang YQ. Treatment of cerebrovascular disease by acupuncture of nerve point combined with flicking-poking. Medical Journal of the Chinese People's Armed Police Forces. 2008;19(2):150-153.                       | Compared two types of acupuncture      |
| 649 | Ye LH, Li WY. Treatment of Deep Cerebral Infarction with Stereo Network Needling Method. Chinese Acupuncture & Moxibustion. 2001;21(3):143-145.                                                                                                    | Compared two types of acupuncture      |
| 650 | Li J. Treatment of early hemiparalysis induced by ischemic stroke with acupuncture method of easing joint movement and opening orifices. Journal of Beijing University of Traditional Chinese Medicine. 2005;28(5):90-92.                          | Not compared with sham control         |

|     |                                                                                                                                                                                                                                                  |                                        |
|-----|--------------------------------------------------------------------------------------------------------------------------------------------------------------------------------------------------------------------------------------------------|----------------------------------------|
| 651 | Shi YL. Treatment of Edema by Acupuncture Plus Herbal Fumigating and Washing in 43 cases of Postapoplectic Hemiplegia. <i>Shanghai Journal of Acupuncture and Moxibustion</i> . 2003;22(10):11-12.                                               | Complex therapy                        |
| 652 | Li WX. Treatment of Hemiplegia after Stroke by Acupuncture Combined with Exercise Therapy. <i>Chin J Rehabilitation</i> . 1998;13(4):163-164.                                                                                                    | Not related to efficacy of acupuncture |
| 653 | Gu HW, Ma WP, Chen W, Li QS, Liu XQ, Liu SH, Yu Q, Liu HL, Dai MT. Treatment of ischemic stroke by acupuncture at Zusanli and Xuanzhong. <i>Journal of Clinical Rehabilitative Tissue Engineering Research</i> . 2007;11(25):4931-4933.          | Not compared with sham control         |
| 654 | Liu YM. Treatment of Pseudobulbar Paralysis by Scalp Acupuncture and Sublingual Needling. <i>Journal of Traditional Chinese Medicine</i> . 2004;24(1):26-27.                                                                                     | Compared two types of acupuncture      |
| 655 | Song LS, Zhang CL, Zhao DW. Treatment of swallowing dysfunction after cerebral apoplexy by acupuncture: A report of 56 cases. <i>Journal of acupuncture and tuina science</i> . 2008;6(1):13-14.                                                 | Uncontrolled trial                     |
| 656 | Guo ZJ, Liu LA, Wang LM, et al. TREATMENT OUTCOME OF DYNAMIC ACUPUNCTURE ON THE MOTOR FUNCTION OF ACUTE STROKE PATIENTS. <i>Acta Academiae Qingdao Universitatis</i> . 2006;42(1):32-36.                                                         | Compared two types of acupuncture      |
| 657 | Yang TK, Park JM. Two cases of combination therapy of acupuncture, herbal medication and speech therapy for aphasic stroke patients. <i>Journal of Korean Oriental Medicine</i> . 2002;23(4):196-202.                                            | Not related to efficacy of acupuncture |
| 658 | Kim GY, Kim JD, Jeong JC. Two cases of dystonia and chorea in basal ganglia. <i>Journal of Korean Oriental Medicine</i> . 1997;3(1):215-228.                                                                                                     | Not related to efficacy of acupuncture |
| 659 | Shin DG, Lee JY, Kim DG. Two cases of stroke in childhood. <i>J Korean Oriental Pediatrics</i> . 2003;17(1):87-97.                                                                                                                               | Not related to efficacy of acupuncture |
| 660 | Kim DH, Lee KH. Utilizing Patterns and Attitude on Collaborating Care of Korean Traditional Medicine and Western Medicine among Cerebral Apoplexy Patients. <i>Korean Journal of Hospital Management</i> . 2004;9(2):76-101.                     | Not clinical trial                     |
| 661 | Teasell RW, Kalra L. What's new in stroke rehabilitation: back to basics. <i>Stroke</i> . 2005;36(2):215-217.                                                                                                                                    | Not clinical trial                     |
| 662 | Sim WJ, Jung SH, Kim SS, Shin HD, Lee JS. Which is more effective for elbow spasticity after stroke, the electroacupuncture on Yin or Yang meridians? <i>Journal of Oriental Rehabilitation Medicine</i> . 2003;13(1):95-111.                    | Compared two types of acupuncture      |
| 663 | He WZ, Zheng JZ. Xingding injection and acupuncture in the treatment of blood viscosity and motor function of paralysis limb in patients with acute cerebral infarction. <i>Chinese Journal of Clinical Rehabilitation</i> . 2005;9(33):105-107. | Not related to efficacy of acupuncture |
| 664 | Shi X. Xingnao Kaiqiao acupuncture therapy for stroke. <i>Chinese Journal of Clinical Rehabilitation</i> . 2003;7(7):1057-1058.                                                                                                                  | Not clinical trial                     |
